# Supplementary material for: Protocol for the development of a core outcome set for cauda equina syndrome: systematic literature review, qualitative interviews, Delphi survey and consensus meeting
Source: PubMed Central journal article supplement (PMC6502054; doi:10.1136/bmjopen-2018-024002), 2019-05-01
Supplement: bmjopen-2018-024002.draft_revisions.pdf [file bmjopen-2018-024002.draft_revisions.pdf]

# BMJ Open

BMJ Open is committed to open peer review. As part of this commitment we make the peer review history of every article we publish publicly available.

When an article is published we post the peer reviewers' comments and the authors' responses online. We also post the versions of the paper that were used during peer review. These are the versions that the peer review comments apply to.

The versions of the paper that follow are the versions that were submitted during the peer review process. They are not the versions of record or the final published versions. They should not be cited or distributed as the published version of this manuscript.

BMJ Open is an open access journal and the full, final, typeset and author-corrected version of record of the manuscript is available on our site with no access controls, subscription charges or pay-per-view fees (<http://bmjopen.bmj.com>).

If you have any questions on BMJ Open's open peer review process please email [editorial.bmjopen@bmj.com](mailto:editorial.bmjopen@bmj.com)

# BMJ Open

## PROTOCOL FOR THE DEVELOPMENT OF A CORE OUTCOME SET FOR CAUDA EQUINA SYNDROME: SYSTEMATIC LITERATURE REVIEW, QUALITATIVE INTERVIEWS, DELPHI SURVEY AND CONSENSUS MEETING

|                               |                                                                                                                                                                                                                                                                                                                                                                                                                                                                                             |
|-------------------------------|---------------------------------------------------------------------------------------------------------------------------------------------------------------------------------------------------------------------------------------------------------------------------------------------------------------------------------------------------------------------------------------------------------------------------------------------------------------------------------------------|
| Journal:                      | <i>BMJ Open</i>                                                                                                                                                                                                                                                                                                                                                                                                                                                                             |
| Manuscript ID                 | bmjopen-2018-024002                                                                                                                                                                                                                                                                                                                                                                                                                                                                         |
| Article Type:                 | Protocol                                                                                                                                                                                                                                                                                                                                                                                                                                                                                    |
| Date Submitted by the Author: | 04-May-2018                                                                                                                                                                                                                                                                                                                                                                                                                                                                                 |
| Complete List of Authors:     | Srikandarajah, Nisaharan; University of Liverpool, Institute of Translational Medicine<br>Noble, Adam; University of Liverpool, Institute of Psychology Health and Society<br>Wilby, Martin; The Walton Centre NHS Foundation Trust, Neurosurgery<br>Clark, Simon; The Walton Centre NHS Foundation Trust, Neurosurgery<br>Williamson, Paula; University of Liverpool, Institute of Translational Medicine<br>Marson, Anthony; University of Liverpool, Institute of Translational Medicine |
| Keywords:                     | Cauda Equina Syndrome, Core Outcome Set, Delphi, Systematic Literature Review, Qualitative Interviews, Consensus                                                                                                                                                                                                                                                                                                                                                                            |
|                               |                                                                                                                                                                                                                                                                                                                                                                                                                                                                                             |

SCHOLARONE™  
Manuscripts

only

1  
2  
3 **PROTOCOL FOR THE DEVELOPMENT OF A CORE OUTCOME SET FOR CAUDA EQUINA**  
4 **SYNDROME: SYSTEMATIC LITERATURE REVIEW, QUALITATIVE INTERVIEWS, DELPHI**  
5 **SURVEY AND CONSENSUS MEETING**  
6  
7  
8  
9

10 **Nisaharan Srikandarajah\***, **Adam Noble•**, **Martin Wilby§**, **Simon Clark§**, **Paula**  
11 **Williamson\***, **Tony Marson\***  
12  
13

14  
15 **Institute**

16 \*Institute of Translational Medicine, University of Liverpool, Liverpool, United Kingdom;  
17 Department of Neurosurgery

18 §Walton Center NHS Foundation Trust, Liverpool, United Kingdom

19 •Institute of Psychology Health and Society, University of Liverpool, Liverpool, United  
20 Kingdom.  
21  
22

23  
24 **Email address**

25 Nisaharan Srikandarajah- nishsri@liv.ac.uk

26 Martin Wilby- martin.wilby@thewaltoncentre.nhs.uk

27 Simon Clark- simon.clark@thewaltoncentre.nhs.uk

28 Adam Noble- adam.noble@liv.ac.uk

29 Paula Williamson- prw@liv.ac.uk

30 Tony Marson- marjon01@liv.ac.uk  
31  
32  
33  
34  
35  
36  
37

38 **Keywords**

39 Cauda Equina Syndrome, Surgery, Outcomes, Core Outcome Set, Systematic Literature  
40 Review, Qualitative Interviews, Delphi Survey, Consensus Meeting  
41  
42  
43  
44

45 **Corresponding Author**

46 Mr Nisaharan Srikandarajah, Spinal Research Team, Room 2:29, Clinical Sciences Center,  
47 University of Liverpool, Lower Lane, Liverpool, UK, L9 7LJ

48 E-mail: [nishsri@liv.ac.uk](mailto:nishsri@liv.ac.uk)

49 Telephone: 01515295945  
50  
51  
52  
53  
54

55 **Word Count** 4,150  
56  
57  
58  
59  
60

## ABSTRACT

### Introduction

Cauda Equina Syndrome (CES) is a serious neurological condition most likely due to compression of the lumbosacral nerve roots. It can result in significant disability in young adults. The evidence is mainly from retrospective studies and there is heterogeneity in the outcomes chosen. We intend to develop a core outcome set for patients with CES. This would be the minimum set of outcomes related to all research studies in CES. It will be decided via a transparent methodology involving key stakeholders.

### Methods and Analysis

A systematic literature review and qualitative patient interviews will form a long list of outcomes. This would include all the outcomes mentioned in the literature and by the patients. The qualitative interviews will be semi structured, audio recorded, transcribed and thematically analysed with the use of NVivo version 10 to determine major themes and the outcomes described by CES patients. The next step would be to prioritise the long list of outcomes to determine which were the most important to CES patients and healthcare professionals who manage CES patients. This would be done through a two-round iterative Delphi survey and consensus meeting to decide the core outcome set for patients who have CES.

### Ethics and Dissemination

The study has ethical approval. The final core outcome set will be published and freely available through the CES patient charity websites.

### Registration Details

This study is registered with the Core Outcome Measures in Effectiveness Trials (COMET) database as study 824.

### Strengths and Limitations of the Study

- Main Strength is that this study is a transparent consensus process which involves key stakeholders (patients and healthcare professionals) to decide a core outcome set for CES.
- Systematic Literature review and qualitative interviews will produce an initial list of outcomes reported by the existing studies and patients. The International Delphi and consensus meeting will prioritise these outcomes to decide the core outcome set.
- The study results rely on the assumption that stakeholders will eventually come to a consensus.
- “What” outcomes to be measured will be decided but further work is required to recommend “how” these outcomes can be measured.

### INTRODUCTION

Cauda equina syndrome (CES) is most likely due to compression of the lumbosacral nerve roots beneath the conus medullaris resulting in sensory-motor symptomatology of the lower limbs and sphincters clinically diagnosed as CES. Symptoms and signs include low back pain, unilateral or bilateral sciatica, saddle anaesthesia and motor weakness of the lower extremities with bladder and bowel dysfunction (1,2).

It is documented in the literature that timely operative decompression for CES secondary to herniated lumbar disc can lead to improved outcomes in patients (3,4,5). It is the most common emergency spine operation performed. In fact, delay or missed diagnosis of this condition incurs heavy litigation costs to the NHS at £336,000 (US \$549,427) per case on average (6) as reported to the Medical Defence Union in the UK. Although a rare condition in the population mainly occurring in adults the National Spinal Task Force showed that there are roughly 1000 operations done each year for CES in the UK so it is not a rare procedure and the economic burden of severe disability is a worrying unknown for both patient quality of life and development of appropriate health services.

### Rationale for development of COS

Through scoping searches, it was identified that there are no randomised controlled trials in

1  
2  
3 this condition, many retrospective observational studies and few prospective studies for the  
4 clinical outcome of patients who have CES. Most patients have had spinal surgery for CES.  
5  
6 There is heterogeneity and inconsistency between studies in outcome reporting. The  
7  
8 outcomes reported in the literature have not been independently validated as important to  
9  
10 key stakeholders.

11  
12 There is no defined core outcome set in CES currently and we intend to develop this core  
13  
14 outcome set for use in CES research studies. A core outcome set defines the minimum  
15  
16 outcomes that should be consistently measured and reported in clinical trials in a specific  
17  
18 area of healthcare (7). With this there will be greater reporting consistency and a reduction  
19  
20 in outcome reporting bias in healthcare studies contributing to systematic reviews and  
21  
22 meta-analysis (8) that can lead to informed healthcare decisions.

23  
24 This will be done through a systematic literature review and qualitative patient interviews to  
25  
26 develop a long list of outcomes. These outcomes are then prioritised through two rounds of  
27  
28 a Delphi process with key stakeholders and a consensus meeting to decide the core  
29  
30 outcome set. This would be published and used for future research studies and improving  
31  
32 outcome reporting in CES.

33  
34 This has been done successfully in rheumatology with the OMERACT group (Outcomes  
35  
36 Measures in Rheumatoid Arthritis Clinical Trials). This international collaboration was  
37  
38 developed in the early 1990s involving patients in the development of core outcome sets  
39  
40 and has improved consistency of reported trials in this speciality (8,9)

41  
42 <http://www.omeract.org>. The Core Outcome Measures in Effectiveness Trials (COMET)  
43  
44 initiative advocates the involvement of patients and currently holds a database of on-going  
45  
46 core outcome set developers (<http://www.comet-initiative.org>) to minimise duplication and  
47  
48 foster health service user engagement (7,10).

### 49 50 **Scope of the COS**

51  
52 We aim to identify “what” outcomes are of concern to key stakeholders using transparent  
53  
54 methodology. We are not intending to consider how these outcomes should be measured.  
55  
56 The 11 minimum Core Outcome Set Standards for Development (COS-STAD)  
57  
58 recommendations are addressed in this protocol (11) (**Table 1**).

**Table 1.** COS-STAD recommendations

| Domain                | Standard Number | Methodology                                                                              | Notes                                                                                                                                 |
|-----------------------|-----------------|------------------------------------------------------------------------------------------|---------------------------------------------------------------------------------------------------------------------------------------|
| Scope Specification   | 1               | The research or practice setting in which the COS is to be applied                       | Research studies that will inform clinical decision making                                                                            |
|                       | 2               | The health condition(s) covered by the COS                                               | All severities of Cauda Equina Syndrome                                                                                               |
|                       | 3               | The population(s) covered by the COS                                                     | Human adults aged 18 or above                                                                                                         |
|                       | 4               | The intervention(s) covered by the COS                                                   | Decompressive spinal surgery and medical management                                                                                   |
| Stakeholders involved | 5               | Those who will use the COS in research                                                   | Clinical trialists in CES are healthcare professionals who manage CES patients. They are included in standard 6.                      |
|                       | 6               | Healthcare professionals with experience of patients with the condition                  | This will include clinicians, experts and healthcare professionals involved in CES management                                         |
|                       | 7               | Patients with the condition or their representatives                                     | Patients who have had an operation for CES will be included <sup>12</sup>                                                             |
| Consensus Process     | 8               | The initial list of outcomes considered both healthcare professionals and patients views | Systematic Literature review <sup>13</sup> considered healthcare professional views. Qualitative interviews considered patient views. |
|                       | 9               | A scoring process and consensus definition were described a priori                       | Described in "Scoring" and "Analysis" section of this protocol                                                                        |
|                       | 10              | Criteria for including/dropping/adding outcomes were described a priori                  | Described in "Analysis" section of this protocol                                                                                      |
|                       | 11              | Care was taken to avoid ambiguity of language used in the list of outcomes               | Plain language and clinical explanations available. These will be pilot tested with patients and healthcare professionals.            |

## Registration

The study is registered on the COMET database as study 824 (<http://www.comet-initiative.org/studies/details/824?result=true>).

## METHODS AND ANALYSIS

Development of the core outcome set will be developed in the following phases:

Phase 1: Systematic Literature Review

Phase 2: Qualitative Interviews

Phase 3: Delphi Survey

Phase 4: Consensus Meeting

### *Phase 1: Systematic Literature Review*

#### Research Question

What outcomes are reported in the medical literature after surgery for CES?

#### Method

The aim of the systematic literature review is to summarise the reporting standards of clinical outcomes following surgery in CES patients using the PRISMA guidelines (14). Most patients who have CES will undergo an operation. It summarised a list of outcomes that had been mentioned in the literature and categorised them into a known taxonomy (15). Full details including search strategy, study selection criteria and results of the systematic literature review have been published (13).

### *Phase 2: Qualitative Interviews*

#### Research Question

What outcomes have patients experienced after having surgery for CES and how do they feel about the management before and after surgery?

#### Method

The objectives of the qualitative interviews with CES patients are:



- To explore the patient experience of living with CES
- To ascertain what the patient feels are the most important outcomes that they are experiencing
- To ascertain what outcomes the patient feels are the most important to research in to improve CES management and aftercare
- To determine who should be key stakeholders
- Identify appropriate language to use for patient Delphi iterative process (16).

These interviews will be documented with audio recorded transcripts. The list of all potential outcomes from the systematic review and qualitative interviews will be placed into outcome domains by the research team to avoid repetition by qualitative method of content analysis (17). The qualitative interviews will be piloted with 2 CES patients to establish if the interview structure and technique is clear, understandable, and capable of answering the research questions. This would recognise any corrections that need to be made to interview structure or technique. Inclusion and exclusion criteria are shown in

**Table 2.**

**Table 2.** Inclusion and Exclusion criteria for qualitative interviews

| INCLUSION CRITERIA                                         | EXCLUSION CRITERIA                    |
|------------------------------------------------------------|---------------------------------------|
| Adult patients                                             | Adults unable to consent for research |
| Diagnosis of Cauda Equina Syndrome                         |                                       |
| Patient underwent surgical procedure                       |                                       |
| Less than 10 years since surgical procedure                |                                       |
| Ability to converse in English and to consent for research |                                       |

### Participant Selection

Adult patients will be selected from those coded as having a diagnosis of cauda equina syndrome in the medical records. There is an existing database of cauda equina patients who have been operated on and followed up by consultants, registrars or nurse specialists. There is no discrimination leading to a patient going to one clinic or the other; it is done by

next available clinic. Adult patients would be 18 or older. They will have undergone spinal surgery to remove the compressive lesion at a single tertiary NHS institution over the past 10 years. This will capture short term and long term outcomes that are deemed important to them. Time to recording outcome will be taken since initial operation for CES.

Stratified purposive sampling (18) was chosen in which the aim is to select groups that display variation in some particular phenomena but each of which is fairly homogenous so the subgroups can be compared. Characteristics known to have an impact on the outcomes being investigated have been identified through scoping searches- severity of CES (CESI and CESR) (19) then there is a subgroup about which little is known and whose circumstances and views need to be explored; short (<2 years) or long term (>2 years and <10 years) since the operation (see **Table 3**). This will produce 4 subcategories to populate. This is to prevent potential bias you may get from having many patients who presented with a severe clinical picture and poor outcomes being more forthcoming and vocal. All subcategories for the sampling frame were deemed a priority and “nesting” of male and female was done within the subcategory. Half would ideally be male and half would be female.

**Table 3.** Sampling frame with suggested quotas

|                                                       | <b>CESI (Cauda Equina Syndrome Incomplete)</b> | <b>CESR (Cauda Equina Syndrome with retention)</b> |
|-------------------------------------------------------|------------------------------------------------|----------------------------------------------------|
| <b>Short term &lt;2 yrs since operation</b>           | 8-10 participants                              | 8-10 participants                                  |
| <b>Long term &gt;2 yrs &lt;10 yrs since operation</b> | 10-12 participants                             | 10-12 participants                                 |

We already have an existing database of 200 patients, which will be updated up to current date with contact details and clinical details of presentation and management. This should produce 50 patients per category. Due to reasons such as patients who have died, long travel distance from institution, not interested in participating it is anticipated that up to 10 patients may reply from each category, which would produce up to 40 patients in total. Options will be given to be interviewed at home, via electronic media (Skype), over the phone or to attend the hospital in person. All patients who consented will be interviewed

1  
2  
3 until “data saturation” is reached and the research team will decide this collectively. Data  
4 saturation is the point where increasing the sample size no longer contributes to new  
5 evidence (20) and even large qualitative studies do not interview more than 50 people (21).  
6  
7 Sticking rigidly to a sample frame could be counter-intuitive as one patient can be data rich  
8 during the interview as opposed to interviewing 5 patients where data is not rich. The aim is  
9 to collect rich data to allow in depth analysis (20). So, although the sampling frame may  
10 serve as a guide we will not use it to start restricting participants especially at the initial  
11 stages of doing the qualitative interviews until data saturation is achieved.  
12  
13 An information leaflet would be sent to participants with a consent form. I would give them  
14 3 weeks to “opt-out” of the study by returning a response slip. After this the participants  
15 will receive a phone call to confirm interest for partaking in the study, to answer any further  
16 questions and to arrange a time and location for the interview.  
17  
18  
19  
20  
21  
22  
23  
24

### 25 **Interview Format and Analysis**

26  
27 A semi-structured interview format will be utilised as per our topic guide (**Supplementary**  
28 **file 1**). Informed consent will be obtained prior to interview where anonymity and  
29 confidentiality will be expressed. Open-ended non-leading questions on their diagnosis,  
30 management post operatively and in the community will be asked allowing the participant  
31 to recount their experiences without unnecessary interruption (21). Discussion will be  
32 directed towards outcomes of importance to the patient as seen in the topic guide.  
33  
34 Interviewer will not divulge personal information about themselves and if any of these  
35 questions are asked they can be answered at the end of the interview session. Reflexivity is  
36 an important concept during qualitative research for striving towards objectivity and  
37 neutrality (20) and analysis of the interviews will consider if bias from the interviewer’s own  
38 beliefs may have crept in. It is anticipated that the interview will last for 45mins to an hour  
39 at each sitting to prevent participant feeling pressurised. The same interviewer (NS) would  
40 be used throughout. All interviewees will be made aware that the interviewer is a doctor  
41 not involved in their on-going care. A sample of these transcripts will be reviewed by a  
42 supervisor not involved in the qualitative interviews to confirm that they had been  
43 undertaken in a satisfactory manner. Initially transcripts will be reviewed to start identifying  
44 which outcomes are important to the patients by labelling and tagging the data. We will use  
45  
46  
47  
48  
49  
50  
51  
52  
53  
54  
55  
56  
57  
58  
59  
60

1  
2  
3 descriptive analysis to detect, categorize, and classify the transcripts using NVivo qualitative  
4 data analysis software version 10. Thematic charting will allow summarisation of the key  
5 outcomes of each individual transcript and overall themes whilst retaining the context and  
6 language in which it was expressed (20). The qualitative interviews will be reported as  
7 outlined by the consolidated criteria for reporting qualitative research (COREQ); a 32 item  
8 checklist (22).  
9  
10  
11  
12

### 13 14 15 ***Phase 3: The Delphi Survey***

16  
17  
18 The outcomes from the systematic literature review and qualitative interviews will create a  
19 long list. This will be condensed by grouping similar outcomes into domains and conforming  
20 with the taxonomy used in the systematic literature review (13<sup>15</sup>). This will be reviewed and  
21 agreed by the study team and pilot tested with the key stakeholders before the Delphi  
22 survey is distributed.  
23  
24  
25  
26  
27

### 28 29 **Research Question**

30 Which outcomes do patients and healthcare professionals think should be included in a core  
31 outcome set for research studies on CES patients?  
32  
33  
34

### 35 36 **Method**

37 In our “modified” Delphi, questioning will take place in two rounds. The condensed list of  
38 outcomes derived from the long list will be presented in the first round of the Delphi.  
39 Patients can also suggest outcomes that have not been mentioned in the first round but  
40 these will not be scored. They will be considered for inclusion into the second round of the  
41 Delphi if, as judged by the CES study team, the outcome does not reflect or is not similar to  
42 another outcome already listed. After the first round, an anonymous summary of the  
43 responses is fed back to the group. Individual participants can decide to keep their original  
44 answers or to change their opinion in the next round. This will lead to the group converging  
45 on a consensus opinion over the course of these two rounds (23). The Delphi will be done by  
46 healthcare professionals, and patients.  
47  
48  
49  
50  
51  
52  
53  
54  
55  
56  
57  
58  
59  
60

1  
2  
3 The level of anonymity will be “fully anonymised” (23) so participants do not know the  
4 identities of other individuals in the group and they will not know specific answers other  
5 individuals had given.  
6  
7  
8

### 9 10 **Inclusion criteria**

11 Participants will be recruited from two key stakeholder groups: patients and healthcare  
12 professionals. All participants should be adults over 18 years of age and able to complete an  
13 online survey in the English language.  
14

15  
16 *Patients-* Participants who have had an operation for CES.

17  
18 *Healthcare Professionals-* All members of the clinical team involved in directly caring for a  
19 patient with CES after surgery such as:  
20

- 21 • Spinal surgeons
- 22 • Spinal specialist nurses
- 23 • Neuro-rehabilitation doctors
- 24
- 25
- 26
- 27
- 28

### 29 **Sampling and Recruitment**

30  
31 *Patients-* At the main site the clinical care team have a pre-existing database of CES patients  
32 they have clinically managed. The clinical care team will send an invitation letter to the  
33 home address of these patients. There will be no follow up calls or further correspondence.  
34 It is the patient’s decision if they wish to be involved and the invitation will contain details of  
35 the website address patients can access if they wish to find out more details regarding the  
36 study. Online patient groups for CES will be contacted internationally. A named contact for  
37 each group will act as the liaison member to circulate the participant invitation email and  
38 poster. This may include the patient groups sharing the recruitment details on social media.  
39  
40  
41  
42  
43  
44

45  
46 *Healthcare Professionals-* The main study site has spinal MDT (multi-disciplinary team)  
47 meetings held weekly. The co-ordinator has a pre-set mailing list that goes to healthcare  
48 professionals involved in the meeting. This will be used to send the participant invitation  
49 email. The membership of national and international associations will be contacted and  
50 invited to participate. A few are listed here below as an example:  
51  
52

- 53 • Society of British Neurological Surgeons (SBNS)
- 54
- 55
- 56
- 57
- 58
- 59
- 60

- British Association of Spine Surgeons (BASS)
- Australian Spine Society
- North American Spine Association (NASS)

Known contacts of the CES study group will be contacted and invited to participate.

Snowballing sampling will be used to increase the sample size. The participant invitation email/ letter will be the first contact for healthcare professionals and patients, which is a short introduction and summary of the study. If they are interested further the participant can proceed to the registration website for further details and obtain a copy of the participant information leaflet.

### Sample Size

There are no strict recommendations for the number of participants required in a Delphi study to gain consensus (23). In general, having more participants will increase the reliability of the group judgement (24). We intend to take a pragmatic approach to sample size and would like to invite all individuals who meet the inclusion criteria as identified above.

Documentation of the number invited and the number from each stakeholder group will be recorded. No further participants will be invited after the first round of the Delphi.

### Consent

Consent will be implicit by the participant registering to take part in the Delphi process via the website.

### Questionnaires

The questionnaire is constructed and delivered in an online format using the DelphiManager software developed by the COMET initiative. Before starting the questionnaire, the participant will be asked to clarify which of the two stakeholder groups they belong to. For each stakeholder group, specific information will be collected:

- *Patients*- Age, gender, location, surgery for CES, years since surgery for CES, employment status
- *Healthcare professionals*- Practicing Field (spinal surgeon, specialist nurse, neuro-rehabilitation etc), years in practice, location, gender

1  
2  
3  
4  
5 Following confirmation of their eligibility to participate in the study, participants will be sent  
6 an on-line link to access the first round of the Delphi process. Instructions of how to  
7 complete the questionnaire will be included at the beginning of each round. Only  
8 participants who respond to the 1<sup>st</sup> round of the Delphi will be invited to participate in 2<sup>nd</sup>  
9 round taking the assumption that if they had not participated in the first round they would  
10 be unwilling to participate in the second round. Data will be collected over at least a 4-week  
11 period for each round of the Delphi process. Participants who have not completed the  
12 survey will be sent reminders via email when they have 2 weeks, 1 week and 48 hours  
13 remaining for completion of the survey. Participants who have not completed the  
14 questionnaire within 4 weeks of the start will be deemed not to have completed that round  
15 of the Delphi. The language used by patients in the qualitative interviews will be used to  
16 help term the outcomes for the Delphi. Plain language summaries by the COMET Patient  
17 Participation, Involvement and Engagement (PoPIE) group was used to develop the Delphi  
18 information sheet. The Delphi will be piloted with 2 participants from each stakeholder  
19 group to highlight any issues with understanding or validity.  
20  
21  
22  
23  
24  
25  
26  
27  
28  
29  
30

### 31 32 **Scoring**

33  
34 For an outcome to be included in the core outcome set there must be a majority agreement  
35 of the critical importance of the outcome and minority agreement that the outcome is not  
36 important. Therefore, in respect for an outcome to be excluded there must be majority  
37 agreement that it is not important and minority agreement that it is important (25). This is  
38 in par with the GRADE (Grading of Recommendations Assessment, Development and  
39 Evaluation) working group recommendations (<http://www.gradeworkinggroup.org>) (26,27).  
40 At the beginning of the Delphi, participants will be reminded the importance of completing  
41 the entire Delphi process. Round one of the Delphi study we will ask participants to rate  
42 each outcome using a 9 point Likert scale. This scoring system was chosen after previous  
43 studies and expert databases showed it differentiates the most between questionnaire  
44 items (23) (<http://www.comet-initiative.org>). 7-9 indicates critical importance. 4 to 6  
45 represents outcomes that are important but not critical whilst 1 to 3 are deemed to be of  
46 limited importance. All outcomes will be carried through to second round with first round  
47 scores displayed for each outcome. Round two will present the anonymised feedback from  
48  
49  
50  
51  
52  
53  
54  
55  
56  
57  
58  
59  
60

each participant stakeholder groups (patient and healthcare professionals). The feedback will show the cumulated scores from each stakeholder group for each outcome and the participant will be asked to rate the outcomes again using the same 9 point Likert scale. If they change their score on the second round they will have the opportunity to explain their reasoning for this. Outcomes which have been suggested in round 1 by the participants and deemed appropriate by the study group will then be entered in for rating in the second round by key stakeholders. After the final Delphi round, there will be a list developed from all stakeholder groups, which will be submitted to a face to face consensus meeting of key stakeholders to discuss what outcomes that should be finally included in the core outcome set. All stakeholder groups who had completed the Delphi survey will be invited to participate in the consensus meeting. Ideally, a trained facilitator would chair this meeting.

### Analysis

Consensus that an outcome should not be included in the COS could, for example, be defined as 70% or more scoring it as 1 to 3 and fewer than 15% scoring it as 7 to 9, which has been seen to be successful with the development of other core outcome sets (28,29) (**Table 4**). This will be done for each stakeholder group. Results at the multiple rounds of the Delphi process and consensus meeting will be documented to include number of participants invited, number completing the section, measure of each group response to an outcome leading to a comprehensive list of all outcomes that should be included in the COS CES.

**Table 4.** Definitions of a consensus

| Classification of consensus | Description                                                           | Definition                                                                            |
|-----------------------------|-----------------------------------------------------------------------|---------------------------------------------------------------------------------------|
| <b>IN</b>                   | Consensus that outcome should be included in the core outcome set     | 70% or more participants scoring as 7 to 9 AND <15% participants scoring as 1 to 3    |
| <b>OUT</b>                  | Consensus that outcome should not be included in the core outcome set | 70% or more participants scoring as 1 to 3 AND <15% of participants scoring as 7 to 9 |



|                         |                                            |               |
|-------------------------|--------------------------------------------|---------------|
| <b>NO<br/>CONSENSUS</b> | Uncertainty about importance<br>of outcome | Anything else |
|-------------------------|--------------------------------------------|---------------|

### **Attrition**

It is expected that some participants will drop out after each round of the Delphi. Each participant will be given a unique participant number when they complete the first round of the Delphi, which will allow identification of the attrition rates between rounds. This will allow identification of participants who have completed all rounds and see if there is any difference bias between those participants who complete the process. We would compare the mean round 1 scores for the participants who completed round 1 and round 2 compared with those that dropped out after round 1.

### ***Phase 4: Consensus Meeting***

All participants registering for the Delphi survey will be asked whether they would be happy to attend a face to face consensus meeting involving patients and healthcare professionals. This would be set up as a tick box on the registration page for the online Delphi. A minority of participants at the consensus meeting will be invited before the Delphi survey to attend the consensus meeting but on the premise, that both rounds of the Delphi are completed. This is to make sure there is representation from certain organisations closely involved with CES patients, research or management. Most participants at the consensus meeting will be those who have completed all rounds of the Delphi and ticked their interest to attend the consensus meeting during registration.

In the development of a breast reconstruction core outcome set patients and professionals were recruited in a 2:1 ratio so that patients' views were represented preferentially as the procedure is a patient selected optional intervention (30). In our study, surgery for CES is usually done as an emergency operation in most cases and strongly recommended to patients so a 1:1 ratio would be expected but we will be pragmatic depending on our response rate. This is to maximise the number of participants involved to help achieve consensus. If there is an overwhelming response with more than 40 participants interested in attending the consensus meeting the study team will consider applying stratified

1  
2  
3 purposive sampling. On the day of the consensus meeting consent will be obtained from the  
4 patient participants. Results of the Delphi process will be discussed at the consensus  
5 meeting. Outcomes categorised as consensus “in” across both stakeholder groups will be  
6 included in the final core outcome set. Outcomes categorised as consensus “out” across  
7 both stakeholder groups will be excluded from the final core outcome set. Participants at  
8 the meeting can vote to accept this or to suggest outcomes from the group that may need  
9 further discussion. These outcomes plus “no consensus” outcomes will be discussed with  
10 further rounds of voting to agree the final core outcome set. If there is no agreed final core  
11 outcome set at the end of the first meeting subsequent meetings will be arranged for this to  
12 happen.  
13  
14  
15  
16  
17  
18  
19  
20  
21

## 22 **ETHICS AND DISSEMINATION**

23  
24  
25 REC and HRA approval was obtained on the 6 December 2016 for the qualitative interviews  
26 from South Central - Hampshire A Research Ethics Committee. REC reference 16/SC/0587.  
27 REC and HRA approval was obtained on 26 March 2018 for the Delphi process and  
28 consensus meeting from North West- Greater Manchester Central Research Ethics  
29 Committee. REC reference was 18/NW/0022. We intend to publish the results of the core  
30 outcome set for CES in an open access journal. It will also be made available through the CES  
31 patient websites. Results will be disseminated through International and national  
32 presentations. The next step would be to identify the appropriate measurement instrument  
33 for each of the outcomes in the core outcome set (31). Core outcome sets are developed in  
34 a number of clinical areas and their use is advocated in the UK by the National Institute for  
35 Health Research (NIHR) Health Technology Assessment (HTA), Cochrane Reviews of the  
36 effects of Healthcare intervention (32) and by World Health Organisation (WHO) handbook  
37 for guideline development (10). The NIHR HTA has added this statement to their application  
38 form, “Where established core outcomes exist they should be included among the list of  
39 outcomes unless there is a good reason to do otherwise.” By developing the CES COS we  
40 intend to reduce outcome reporting bias, heterogeneity, and improve the quality of  
41 research studies in CES. This will allow us to synthesise the data and make more robust  
42 evidence based decisions regarding CES management.  
43  
44  
45  
46  
47  
48  
49  
50  
51  
52  
53  
54  
55  
56  
57  
58  
59  
60

## Supplementary file 1- Topic guide

### Author Contributions

NS, MW, SC conceived the project. TM is the principal investigator for the study. NS is the clinical research fellow responsible for management of the project, wrote the protocol and manuscript. TM, PW, AN, MW, SC provide supervision, have input in all aspects of the project and commented on drafts of the manuscript. All authors have read and approved the manuscript.

### Funding

The paper is independent research funded by the Walton Centre Research Funds and Royal College of Surgeons Research Fellowship.

### Competing Interests

None Declared

### REFERENCES

1. Kostuik JP. Controversies in cauda equina syndrome and lumbar disk herniation. *Current Opinion in Orthopaedics* 1993;4(2):125-28.
2. Gardner A, Gardner E, Morley T. Cauda equina syndrome: A review of the current clinical and medico-legal position. *Eur Spine J* 2011;20(5):690-97. doi: <http://dx.doi.org/10.1007/s00586-010-1668-3>
3. Ahn UM, Ahn NU, Buchowski JM, et al. Cauda equina syndrome secondary to lumbar disc herniation. *Spine* 2000;25(12):1515-22. doi: <http://dx.doi.org/10.1097/00007632-200006150-00010>
4. Todd NV. Cauda equina syndrome: The timing of surgery probably does influence outcome. *Br J Neurosurg* 2005;19(4):301-06. doi: <http://dx.doi.org/10.1080/02688690500305324>
5. Srikandarajah N, Boissaud-Cooke MA, Clark S, et al. Does early surgical decompression in cauda equina syndrome improve bladder outcome? *Spine (03622436)* 2015;40(8):580-83. doi: 10.1097/BRS.0000000000000813
6. Daniels EW, Gordon Z, French K, et al. Review of medicolegal cases for cauda equina syndrome: what factors lead to an adverse outcome for the provider? *Orthopedics* 2012;35(3):200-00. doi: 10.3928/01477447-20120222-15
7. Williamson PR, Altman DG, Blazeby JM, et al. Developing core outcome sets for clinical trials: issues to consider. *Trials* 2012;13(1):132.

- 1
- 2
- 3 8. Kirkham JJ, Gargon E, Clarke M, et al. Can a core outcome set improve the quality of
- 4 systematic reviews?—a survey of the Co-ordinating Editors of Cochrane Review
- 5 Groups. *Trials* 2013;14(1):21.
- 6 9. Tugwell P, Boers M, Brooks P, et al. OMERACT: an international initiative to improve
- 7 outcome measurement in rheumatology. *Trials* 2007;8(1):38.
- 8 10. Williamson PR, Altman DG, Blazeby JM, et al. The COMET (core outcome measures in
- 9 effectiveness trials) initiative. *Trials* 2011;12(Suppl 1):A70.
- 10 11. Kirkham JJ, Davis K, Altman DG, et al. Core Outcome Set-STANDards for Development:
- 11 The COS-STAD recommendations. *PLoS medicine* 2017;14(11):e1002447.
- 12 12. Young B, Bagley H. Including patients in core outcome set development: issues to
- 13 consider based on three workshops with around 100 international delegates. *Research*
- 14 *Involvement and Engagement* 2016;2(1):25.
- 15 13. Srikandarajah N, Wilby M, Clark S, et al. Outcomes reported after surgery for Cauda
- 16 Equina Syndrome: A Systematic Literature Review. *Spine* 2018
- 17 14. Moher D, Liberati A, Tetzlaff J, et al. Preferred reporting items for systematic reviews
- 18 and meta-analyses: the PRISMA statement. *PLoS medicine* 2009;6(7):e1000097.
- 19 15. Dodd S, Clarke M, Becker L, et al. A taxonomy has been developed for outcomes in
- 20 medical research to help improve knowledge discovery. *Journal of clinical*
- 21 *epidemiology* 2018;96:84-92.
- 22 16. Keeley T, Khan H, Pinfold V, et al. Core outcome sets for use in effectiveness trials
- 23 involving people with bipolar and schizophrenia in a community-based setting
- 24 (PARTNERS2): study protocol for the development of two core outcome sets. *Trials*
- 25 2015;16(1):47.
- 26 17. Elo S, Kyngäs H. The qualitative content analysis process. *Journal of advanced nursing*
- 27 2008;62(1):107-15.
- 28 18. Quinn Patton M. *Qualitative Research* John Wiley & Sons: Ltd, 2005.
- 29 19. Gleave JRW, Macfarlane R. Cauda equina syndrome: What is the relationship between
- 30 timing of surgery and outcome? *Br J Neurosurg* 2002;16(4):325-28. doi:
- 31 <http://dx.doi.org/10.1080/0268869021000032887>
- 32 20. Ritchie J, Lewis J, Nicholls CM, et al. *Qualitative research practice: A guide for social*
- 33 *science students and researchers*: Sage 2013.
- 34 21. Britten N. *Qualitative research: qualitative interviews in medical research*. *Bmj*
- 35 1995;311(6999):251-53.
- 36 22. Tong A, Sainsbury P, Craig J. Consolidated criteria for reporting qualitative research
- 37 (COREQ): a 32-item checklist for interviews and focus groups. *International journal*
- 38 *for quality in health care* 2007;19(6):349-57.
- 39 23. Sinha IP, Smyth RL, Williamson PR. Using the Delphi technique to determine which
- 40 outcomes to measure in clinical trials: recommendations for the future based on a
- 41 systematic review of existing studies. *PLoS medicine* 2011;8(1):e1000393.
- 42 24. Murphy M. Consensus development methods and their use in clinical guideline
- 43 development. *Health Technol Assess* 1998;2:1-88.
- 44 25. Jaeschke R, Guyatt GH, Dellinger P, et al. Use of GRADE grid to reach decisions on
- 45 clinical practice guidelines when consensus is elusive. *BMJ: British Medical Journal*
- 46 *(Online)* 2008;337
- 47 26. Atkins D, Best D, Briss PA, et al. Grading quality of evidence and strength of
- 48 recommendations. *BMJ (Clinical research ed)* 2004;328(7454):1490-90.
- 49 27. Guyatt GH, Oxman AD, Vist GE, et al. GRADE: an emerging consensus on rating quality
- 50 of evidence and strength of recommendations. *BMJ (Clinical research ed)*
- 51 2008;336(7650):924-26.
- 52
- 53
- 54
- 55
- 56
- 57
- 58
- 59
- 60

- 1  
2  
3 28. Harman NL, Bruce IA, Callery P, et al. MOMENT–Management of Otitis Media with  
4 Effusion in Cleft Palate: protocol for a systematic review of the literature and  
5 identification of a core outcome set using a Delphi survey. *Trials* 2013;14(1):70.  
6 29. Haywood K, Griffin X, Achten J, et al. Developing a core outcome set for hip fracture  
7 trials. *Bone Joint J* 2014;96(8):1016-23.  
8 30. Potter S, Holcombe C, Ward J, et al. Development of a core outcome set for research and  
9 audit studies in reconstructive breast surgery. *British Journal of Surgery*  
10 2015;102(11):1360-71.  
11 31. Prinsen CA, Vohra S, Rose MR, et al. How to select outcome measurement instruments  
12 for outcomes included in a “Core Outcome Set”–a practical guideline. *Trials*  
13 2016;17(1):449.  
14 32. Rosenbaum SE, Glenton C, Oxman AD. Summary-of-findings tables in Cochrane  
15 reviews improved understanding and rapid retrieval of key information. *Journal of*  
16 *clinical epidemiology* 2010;63(6):620-26.  
17  
18  
19  
20  
21  
22  
23  
24  
25  
26  
27  
28  
29  
30  
31  
32  
33  
34  
35  
36  
37  
38  
39  
40  
41  
42  
43  
44  
45  
46  
47  
48  
49  
50  
51  
52  
53  
54  
55  
56  
57  
58  
59  
60

IRAS: 201946 Version: 1.0 Date: 23/09/16

## TOPIC GUIDE CES QUALITATIVE INTERVIEWS

### Aims and Objectives

- To explore the patient experience of living with Cauda Equina Syndrome (CES)
- To ascertain what the patient feels are the most important outcomes that they are experiencing
- To ascertain what outcomes the patient feels are the most important to research in to improve CES management and aftercare
- To determine who should be key stakeholders
- Identify appropriate language to use for patient Delphi iterative process.

### Introduction (5-10 mins)

Interviewer Name

Interviewer Occupation

Explain basic definition of CES

Explain looking for challenges experienced after the operation for CES

Explain expected intention, sensitive subjects and duration of interview and confidentiality

Confirm consent to qualitative interview

### Background (<5 mins)

Interviewee name

Interviewee age

Interviewee occupation

Other medical conditions

When was your operation for CES?

### Interview questions (30 mins)

How has your experience of this condition; Cauda Equina Syndrome been?

- What was it like before the back operation?

- What was it like after the back operation?

How do you feel your condition has been managed in hospital and in the community?

What were your expectations of life health-wise after the operation and what is the reality like?

IRAS: 201946 Version: 1.0 Date: 23/09/16

1  
2  
3 Due to this condition what do you feel are the challenges to your health and  
4 wellbeing?

5 -bowel/bladder

6 -sex life

7 -back/ leg pain

8 -psychological

9 -**anxiety/fear**

10 -other  
11  
12

13  
14 Would you be able to prioritise the importance of these for you now?  
15

16 Was the importance of these different at earlier stages of the condition? (More  
17 relevant to those in the long term CES category)  
18

19 Through this process of living with CES who else do you think has a good handle  
20 on the condition? If anyone? -Gauge other potential key stakeholders  
21  
22

23 Tell me a bit about the support you had for the condition?  
24

25 **Closing remarks (5 mins)**  
26

27 Considering your hospital, post op and follow up experience what would you  
28 have liked to change?  
29

30 -support services

31 -more streamlined service with dedicated clinics

32 -research into timing for CES operations

33 -follow up as to the effects of long term CES  
34  
35

36 Offer the opportunity for the participant to comment on their interview  
37 transcript after transcription.  
38  
39  
40  
41  
42  
43  
44  
45  
46  
47  
48  
49  
50  
51  
52  
53  
54  
55  
56  
57  
58  
59  
60

# BMJ Open

## PROTOCOL FOR THE DEVELOPMENT OF A CORE OUTCOME SET FOR CAUDA EQUINA SYNDROME: SYSTEMATIC LITERATURE REVIEW, QUALITATIVE INTERVIEWS, DELPHI SURVEY AND CONSENSUS MEETING

|                                 |                                                                                                                                                                                                                                                                                                                                                                                                                                                                                              |
|---------------------------------|----------------------------------------------------------------------------------------------------------------------------------------------------------------------------------------------------------------------------------------------------------------------------------------------------------------------------------------------------------------------------------------------------------------------------------------------------------------------------------------------|
| Journal:                        | <i>BMJ Open</i>                                                                                                                                                                                                                                                                                                                                                                                                                                                                              |
| Manuscript ID                   | bmjopen-2018-024002.R1                                                                                                                                                                                                                                                                                                                                                                                                                                                                       |
| Article Type:                   | Protocol                                                                                                                                                                                                                                                                                                                                                                                                                                                                                     |
| Date Submitted by the Author:   | 25-Oct-2018                                                                                                                                                                                                                                                                                                                                                                                                                                                                                  |
| Complete List of Authors:       | Srikandarajah, Nisaharan; University of Liverpool, Institute of Translational Medicine<br>Noble, Adam; University of Liverpool, Institute of Psychology Health and Society<br>Wilby, Martin; The Walton Centre NHS Foundation Trust, Neurosurgery<br>Clark, Simon; The Walton Centre NHS Foundation Trust, Neurosurgery<br>Williamson, Paula; University of Liverpool , Institute of Translational Medicine<br>Marson, Anthony; University of Liverpool, Institute of Translational Medicine |
| <b>Primary Subject Heading</b>: | Surgery                                                                                                                                                                                                                                                                                                                                                                                                                                                                                      |
| Secondary Subject Heading:      | Medical management, Patient-centred medicine, Qualitative research, Research methods, Neurology                                                                                                                                                                                                                                                                                                                                                                                              |
| Keywords:                       | Cauda Equina Syndrome, Core Outcome Set, Delphi, Systematic Literature Review, Qualitative Interviews, Consensus                                                                                                                                                                                                                                                                                                                                                                             |
|                                 |                                                                                                                                                                                                                                                                                                                                                                                                                                                                                              |

SCHOLARONE™  
Manuscripts



1  
2  
3 **PROTOCOL FOR THE DEVELOPMENT OF A CORE OUTCOME SET FOR CAUDA EQUINA**  
4 **SYNDROME: SYSTEMATIC LITERATURE REVIEW, QUALITATIVE INTERVIEWS, DELPHI SURVEY**  
5 **AND CONSENSUS MEETING**  
6  
7  
8  
9

10 **Nisaharan Srikandarajah\***, **Adam Noble•**, **Martin Wilby§**, **Simon Clark§**, **Paula Williamson\***,  
11 **Tony Marson\***  
12  
13

14  
15  
16 **Institute**

17  
18 \*Institute of Translational Medicine, University of Liverpool, Liverpool, United Kingdom;  
19 Department of Neurosurgery

20 §Walton Center NHS Foundation Trust, Liverpool, United Kingdom

21 •Institute of Psychology Health and Society, University of Liverpool, Liverpool, United  
22 Kingdom.  
23  
24  
25

26 **Email address**

27 Nisaharan Srikandarajah- nishsri@liv.ac.uk

28 Martin Wilby- martin.wilby@thewaltoncentre.nhs.uk

29 Simon Clark- simon.clark@thewaltoncentre.nhs.uk

30 Adam Noble- adam.noble@liv.ac.uk

31 Paula Williamson- prw@liv.ac.uk

32 Tony Marson- marjon01@liv.ac.uk  
33  
34  
35  
36  
37  
38  
39

40 **Keywords**

41  
42 Cauda Equina Syndrome, Surgery, Outcomes, Core Outcome Set, Systematic Literature Review,  
43 Qualitative Interviews, Delphi Survey, Consensus Meeting  
44  
45  
46  
47

48 **Corresponding Author**

49 Mr Nisaharan Srikandarajah, Spinal Research Team, Room 2:29, Clinical Sciences Center,  
50 University of Liverpool, Lower Lane, Liverpool, UK, L9 7LJ  
51  
52

53 E-mail: [nishsri@liv.ac.uk](mailto:nishsri@liv.ac.uk)

54  
55 Telephone: 01515295945  
56  
57  
58  
59  
60

1  
2  
3  
4  
5 **Word Count 5,246**

6  
7 **ABSTRACT**

8  
9 **Introduction**

10 Cauda Equina Syndrome (CES) is a serious neurological condition most commonly due to  
11 compression of the lumbosacral nerve roots, which can result in significant disability. The  
12 evidence for acute intervention in CES is mainly from retrospective studies. There is  
13 heterogeneity in the outcomes chosen for analysis in these studies, which makes it difficult to  
14 synthesise the data across studies. This study will develop a core outcome set for use in future  
15 studies of CES, engaging with key stakeholders and using transparent methodology. This will  
16 help ensure that relevant outcomes are used in future, and will facilitate attempts to  
17 summarise data across studies in systematic reviews.  
18  
19  
20  
21  
22  
23  
24  
25  
26

27 **Methods and Analysis**

28 A systematic literature review will document all the outcomes for CES after surgery mentioned  
29 in the literature. The qualitative interviews will be semi structured, audio recorded, transcribed  
30 and thematically analysed with the use of NVivo version 10 to determine the themes and the  
31 outcomes described by CES patients. The outcomes from the literature review and patient  
32 interviews will be combined and prioritised to determine what the most important outcomes  
33 are in CES research studies to patients and healthcare professionals. The prioritisation will be  
34 done through a two-round iterative Delphi survey and a consensus meeting. This process will  
35 decide the core outcome set for patients with CES.  
36  
37  
38  
39  
40  
41  
42  
43  
44

45 **Ethics and Dissemination**

46 REC and HRA approval was obtained on the 6/12/16 for the qualitative interviews from South  
47 Central - Hampshire A REC. REC reference 16/SC/0587. REC and HRA approval was obtained on  
48 26/3/18 for the Delphi process and consensus meeting from North West- Greater Manchester  
49 Central REC. REC reference was 18/NW/0022. The final core outcome set will be published and  
50 freely available.  
51  
52  
53  
54  
55  
56  
57  
58  
59  
60

## Registration Details

This study is registered with the Core Outcome Measures in Effectiveness Trials (COMET) database as study 824.

## Strengths and Limitations of the Study

- The main strength for this study is a transparent consensus process which involves key stakeholders (patients and healthcare professionals) to decide a core outcome set for CES.
- A core outcome set will allow synthesis of data from future CES research studies and allow an evidence based treatment and management plan to be developed.
- The development of a core outcome set relies on the assumption that the key stakeholders will eventually come to a consensus.
- The outcomes that constitute the “core outcome set” will be reported. How these outcomes will be measured will not be determined in this study and requires further work.

## INTRODUCTION

Cauda equina syndrome (CES) is due to dysfunction of the lumbosacral nerve roots beneath the conus medullaris resulting in sensory-motor deficits of the lower limbs and sphincter dysfunction. Symptoms and signs include low back pain, unilateral or bilateral sciatica, saddle anaesthesia and motor weakness of the lower extremities with bladder and/or bowel dysfunction<sup>1 2</sup>. The most common cause of CES is a herniated lumbar disc, and represents 2% of all herniated lumbar discs. CES has an incidence of 2 per 100,000 in England and is an indication for emergency decompression surgery<sup>3 4 5</sup>. Other less common etiologies include spinal stenosis, spinal tumours, hematomas, fractures, and infections<sup>2</sup>. The National Spinal Task Force showed that there are 981 operations done each year for CES in the UK from 2010 to 2011<sup>6</sup>. Surgical intervention for CES is not a rare procedure and the economic burden of severe disability is a worrying unknown for both patient quality of life and development of appropriate health services.

1  
2  
3 The evidence for acute intervention in CES is mainly from retrospective studies<sup>7 8</sup>. The  
4 importance of categorising CES into CES incomplete (CESI) and CES complete with urinary  
5 retention (CESR) has been highlighted in the literature<sup>4</sup>. CESR describes painless urinary  
6 retention with overflow incontinence and complete perianal sensory loss. When the patient  
7 complains of CESI, the symptoms include urinary issues of neurogenic origin including loss of  
8 desire to void, altered urinary sensation, and hesitancy with partial saddle anaesthesia.  
9  
10  
11  
12  
13  
14  
15

16 It is documented in the literature that timely operative decompression for CES secondary to  
17 herniated lumbar disc can lead to improved outcomes in patients<sup>9 7 8</sup>. In fact, delay or missed  
18 diagnosis of this condition incurs heavy litigation costs to the NHS at £336,000 (US \$549,427)  
19 per case on average<sup>10</sup> as reported to the Medical Defence Union in the UK.  
20  
21  
22  
23  
24

### 25 **Rationale for the development of a “Core Outcome Set” (COS)**

26  
27

28 An “outcome” in relation to clinical research studies is defined to be a measurement or  
29 observation used to capture and assess the effect of treatment such as assessment of the side  
30 effects (risk) or effectiveness (benefits).<sup>11</sup>  
31  
32  
33  
34

35 Before the systematic literature review a scoping review was undertaken<sup>12</sup>. It was identified  
36 that there were no randomised controlled trials, many retrospective observational studies and  
37 few prospective studies reporting the clinical outcome of patients with CES. There is  
38 heterogeneity and inconsistency in the outcomes reported in the literature for CES. The  
39 outcomes reported in the literature have not been independently validated as important to key  
40 stakeholders.  
41  
42  
43  
44  
45

46 There is no defined core outcome set in cauda equina syndrome (CES) currently and this  
47 protocol will describe the methods of how to develop it. A core outcome set defines the  
48 minimum outcomes that should be consistently measured and reported in clinical trials in a  
49 specific area of healthcare<sup>13</sup>. With this there will be greater reporting consistency and a  
50 reduction in outcome reporting bias in healthcare studies contributing to systematic reviews  
51 and meta-analysis<sup>14</sup> that can lead to informed healthcare decisions.  
52  
53  
54  
55  
56  
57  
58  
59  
60

Initially, a systematic literature review and qualitative patient interviews will be conducted to document the outcomes for CES patients after surgery. These outcomes will be combined and prioritised through two rounds of a Delphi process with key stakeholders and a consensus meeting to decide the core outcome set. The core outcome set would be published and used for future research studies and improving outcome reporting in CES.

The development of core outcome sets has been done successfully in rheumatology with the OMERACT group (Outcomes Measures in Rheumatoid Arthritis Clinical Trials). This international collaboration was developed in the early 1990s involving patients in the development of core outcome sets and has improved consistency of reported trials in this speciality<sup>14 15</sup>. The Core Outcome Measures in Effectiveness Trials (COMET) initiative advocates the involvement of patients and currently holds a database of on-going core outcome set developers<sup>16</sup> to minimise duplication and foster health service user engagement<sup>13 17</sup>.

### Scope of the COS

We aim to identify “what” outcomes of patients with CES are of concern to key stakeholders using transparent methodology. We are not intending to consider how these outcomes should be measured. The 11 minimum Core Outcome Set Standards for Development (COS-STAD) recommendations are addressed in this protocol<sup>18</sup> (**Table 1**).

**Table 1. COS-STAD recommendations**

| Domain              | Standard Number | Methodology                                                        | Notes                                                      |
|---------------------|-----------------|--------------------------------------------------------------------|------------------------------------------------------------|
| Scope Specification | 1               | The research or practice setting in which the COS is to be applied | Research studies that will inform clinical decision making |
|                     | 2               | The health condition(s) covered by the COS                         | All severities of Cauda Equina Syndrome                    |
|                     | 3               | The population(s) covered by the COS                               | Human adults aged 18 or above                              |
|                     | 4               | The intervention(s) covered by the COS                             | Clinical management of CES including surgery               |
| Stakeholders        | 5               | Those who will use the COS in research                             | Clinical trialists in CES are healthcare                   |

|                   |    |                                                                                          |                                                                                                                                       |
|-------------------|----|------------------------------------------------------------------------------------------|---------------------------------------------------------------------------------------------------------------------------------------|
| involved          |    |                                                                                          | professionals who manage CES patients. They are included in standard 6.                                                               |
|                   | 6  | Healthcare professionals with experience of patients with the condition                  | This will include clinicians, experts and healthcare professionals involved in CES management                                         |
|                   | 7  | Patients with the condition or their representatives                                     | Patients with a diagnosis of CES will be included <sup>19</sup>                                                                       |
| Consensus Process | 8  | The initial list of outcomes considered both healthcare professionals and patients views | Systematic Literature review <sup>20</sup> considered healthcare professional views. Qualitative interviews considered patient views. |
|                   | 9  | A scoring process and consensus definition were described a priori                       | Described in “Scoring” and “Analysis” section of this protocol                                                                        |
|                   | 10 | Criteria for including/dropping/adding outcomes were described a priori                  | Described in “Analysis” section of this protocol                                                                                      |
|                   | 11 | Care was taken to avoid ambiguity of language used in the list of outcomes               | Plain language and clinical explanations available. These will be pilot tested with patients and healthcare professionals.            |

### Registration

The study is registered on the COMET database as study 824 (<http://www.comet-initiative.org/studies/details/824?result=true>).

## METHODS AND ANALYSIS

Development of the core outcome set will be developed in four phases with their estimated time frames highlighted in the overall study timeline (**Figure 1**). Timeframes includes the estimated duration for ethical approval, study recruitment and analysis.

### *Phase 1: Systematic Literature Review*

#### **Research Question**

What outcomes are reported in the medical literature after surgery for CES?

#### **Summary**

The aim of the systematic literature review was to summarise the reporting standards of the clinical outcomes after surgery in CES patients following the PRISMA guidelines<sup>21</sup>. Most CES cases are due to lumbar disc herniation<sup>22</sup>, which requires urgent surgical intervention. Study inclusion was limited to articles with patients who were surgically managed and whose outcomes were recorded.

The systematic literature review summarised the outcomes that had been mentioned in the literature and categorised them into a known taxonomy<sup>23</sup>. 1873 articles were identified through the search strategy of which 61 met the inclusion criteria. Inclusion criteria specified details regarding the study design, diagnosis, procedure, publication date, language and the patient age. 737 outcomes were reported verbatim in the 61 included articles. These were then

1  
2  
3 categorised to 20 higher order groupings called “outcome domains.” The most commonly  
4 reported outcomes were bladder function (70.5%), motor function (63.9%), and sensation  
5 (50.8%). There was significant variation in the terms used for each outcome for example,  
6  
7 bladder function outcome domain had 141 different terms. Significant heterogeneity was  
8  
9 evident in the outcomes reported in CES research studies. This highlighted a need for a core  
10  
11 outcome set in CES to be developed.<sup>20</sup>  
12  
13  
14  
15

## 16 ***Phase 2: Qualitative Interviews***

### 17 **Research Question**

18  
19  
20  
21 What outcomes have CES patients experienced after surgery and how do they feel about the  
22  
23 management before and after surgery?  
24  
25

### 26 **Method**

27  
28  
29 The objectives of the qualitative interviews with CES patients are:

- 30  
31 • To explore the patient experience of living with CES.
- 32  
33 • To document what the patient describes as the most important outcomes they are  
34  
35 experiencing.
- 36  
37 • To determine what service improvements can be made to improve CES management and  
38  
39 aftercare.
- 40  
41 • To determine who should be the key stakeholders in the Delphi survey.
- 42  
43 • Identify appropriate language to use for the Delphi survey<sup>24</sup>.  
44  
45

46  
47 These interviews will be documented with audio recorded transcripts. The list of all potential  
48  
49 outcomes from the systematic review and qualitative interviews will be placed into outcome  
50  
51 domains by the research team to avoid repetition by qualitative method of content analysis<sup>25</sup>.

52  
53 The qualitative interviews will be piloted with 2 CES patients to establish if the interview  
54  
55 structure and technique is clear, understandable, and capable of answering the research  
56  
57  
58  
59



questions. This would recognise any corrections that need to be made to the interview structure or technique. Inclusion and exclusion criteria are shown in **Table 2**.

**Table 2.** Inclusion and Exclusion criteria for qualitative interviews

| INCLUSION CRITERIA                                         | EXCLUSION CRITERIA                    |
|------------------------------------------------------------|---------------------------------------|
| Adult patients                                             | Adults unable to consent for research |
| Diagnosis of Cauda Equina Syndrome                         |                                       |
| Patient underwent a surgical procedure for CES             |                                       |
| Less than 10 years since the surgical procedure            |                                       |
| Ability to converse in English and to consent for research |                                       |

### Participant Selection

Adult patients for the qualitative interviews will be selected from those coded as having a diagnosis of cauda equina syndrome in the medical records. There is an existing database of cauda equina patients who have been operated on and followed up by consultants, registrars or nurse specialists depending on the next available clinic. Adult patients will be 18 years or older who have had spinal surgery to remove the compressive lesion at a single tertiary NHS institution over the past 10 years. The qualitative interviews will capture short and long term outcomes that are deemed important to them. Duration of the recorded outcomes will be calculated since the initial operation for CES.

Stratified purposive sampling<sup>26</sup> was chosen in which the aim is to select groups that display variation in particular characteristics so the subgroups can then be compared. Characteristics known to have an impact on the outcomes being investigated have been identified- severity of CES (CESI or CESR)<sup>27</sup> then there is a subgroup about which little is known and whose circumstances and views need to be explored; short ( $\leq 2$  years) or long term ( $> 2$  years and  $\leq 10$  years) since the operation (see **Table 3**). This will produce 4 subcategories to populate. This is to prevent potential bias you may get from having many patients who presented with a severe

clinical picture and poor outcomes being more forthcoming and vocal. All subcategories for the sampling frame will be deemed a priority. Half the participants would ideally be male and half would be female.

**Table 3.** Sampling frame with suggested quotas

|                                                                                             | <b>CESI (Cauda Equina Syndrome Incomplete)</b> | <b>CESR (Cauda Equina Syndrome with retention)</b> |
|---------------------------------------------------------------------------------------------|------------------------------------------------|----------------------------------------------------|
| <b>Short term since the operation (<math>\leq 2</math> years)</b>                           | 10 participants                                | 10 participants                                    |
| <b>Long term since the operation (<math>&gt; 2</math> years <math>\leq 10</math> years)</b> | 10 participants                                | 10 participants                                    |

There is an existing database of 200 patients with contact details and clinical details of presentation and management, which will be updated up to the current date to exclude patients who are deceased. This should produce 50 patients per category. Due to reasons such as long travel distance from institution, not interested in participating it is anticipated that up to 10 patients may reply from each category, which would produce up to 40 patients in total. Options will be given to be interviewed at home, via electronic media (Skype), over the phone or to attend the hospital in person. After informed consent, patients will be interviewed until “data saturation” is reached. The research team will decide when data saturation is reached. Data saturation is the point where increasing the sample size no longer contributes to new evidence<sup>28</sup> moreover even large qualitative studies do not interview more than 50 people<sup>29</sup>. Additional patients will be interviewed in the subcategories if one group has a better response rate until data saturation is achieved.

Sticking rigidly to a sample frame could be counter-intuitive as one patient can be data rich during the interview as opposed to interviewing 5 patients where data is not rich. The aim is to collect rich data to allow in depth analysis<sup>28</sup>. So, although the sampling frame may serve as a guide it will not be used to start restricting participants especially at the initial stages of doing the qualitative interviews until data saturation is achieved.

1  
2  
3 An information leaflet and stamped addressed envelope to return the response slip will be sent  
4 to participants with a consent form. Patients will have 3 weeks to “opt-out” of the study by  
5 returning a response slip, through email or telephone with the research team. After this the  
6 participants will receive a phone call from the research team to confirm interest for  
7 participating in the study, to answer any further questions and to arrange a time and location  
8 for the interview.  
9  
10  
11  
12  
13  
14  
15

### 16 **Interview Format and Analysis**

17 A semi-structured interview format will be utilised as per our topic guide (**Supplementary file**  
18 **1**). Qualitative semi-structured interviews were chosen over questionnaires and focus groups as  
19 it was believed that patient opinions over sensitive subject matter such as bowel, bladder and  
20 sexual function would be better elicited in a private one to one interview and they were less  
21 likely to inhibit their contribution<sup>28</sup>. In addition, one-to-one interviews are more accessible for  
22 potential participants and for patients with mobility restrictions.  
23  
24  
25  
26  
27  
28

29 Informed consent will be obtained prior to the interview where anonymity and confidentiality  
30 will be expressed. The consent will also request the patient’s permission for their general  
31 practitioner (GP) to be informed of their involvement in the study. This is so that if there is any  
32 distress during the patient interviews, which requires medical management they can be  
33 referred to their GP. Open-ended non-leading questions on their diagnosis, management post  
34 operatively in hospital and management in the community will be asked allowing the  
35 participant to describe their experiences without unnecessary interruption<sup>29</sup>. Discussion will be  
36 directed towards outcomes of importance to the patient as seen in the topic guide. The  
37 interviewer will not discuss their own opinions about CES and if these are asked they will be  
38 answered at the end of the interview session. Reflexivity is an important concept during  
39 qualitative research for striving towards objectivity and neutrality<sup>28</sup> and the analysis of the  
40 interviews will consider if bias from the interviewer’s own beliefs may have crept in. It is  
41 anticipated that the interview will last for 45 minutes to an hour at each sitting to prevent the  
42 participant feeling fatigued. The same interviewer (NS) will be used for all the patient  
43 interviews. All interviewees will be made aware that the interviewer is a doctor not involved in  
44  
45  
46  
47  
48  
49  
50  
51  
52  
53  
54  
55  
56  
57  
58  
59  
60

1  
2  
3 their on-going care. A sample of the transcripts will be reviewed by a supervisor not involved in  
4 the qualitative interviews to confirm that they were undertaken in a satisfactory manner.  
5  
6 Initially, the transcripts will be reviewed to start identifying which outcomes are important to  
7 the patients by labelling the data using NVivo qualitative data analysis software version 10. A  
8 pragmatic approach will be taken by using thematic analysis as per the Braun and Clarke  
9 method<sup>30</sup>. It is a pattern-based qualitative method like grounded theory<sup>31</sup> and interpretative  
10 phenomenological analysis<sup>32</sup> but is not linked to a specific theoretical framework. This method  
11 will allow summarisation of the key outcomes of each individual transcript and overall themes  
12 whilst retaining the context and language in which it was expressed<sup>28</sup>. The qualitative  
13 interviews will be reported as outlined by the consolidated criteria for reporting qualitative  
14 research (COREQ); a 32 item checklist<sup>33</sup>.  
15  
16  
17  
18  
19  
20  
21  
22  
23  
24

### 25 ***Phase 3: The Delphi Survey***

26  
27  
28  
29 The outcomes from the systematic literature review and qualitative interviews will create a long  
30 list<sup>11</sup>. This will be condensed by grouping similar outcomes into domains and conforming with  
31 the taxonomy used in the systematic literature review<sup>20 23</sup>. This will be reviewed and agreed by  
32 the study team and pilot tested with the key stakeholders before the Delphi survey is  
33 distributed.  
34  
35  
36  
37  
38  
39

### 40 **Research Question**

41 Which outcomes do patients and healthcare professionals think should be included in a core  
42 outcome set for patients with CES?  
43  
44  
45  
46

### 47 **Method**

48  
49 All patients with CES will be invited to participate in the Delphi survey regardless of whether  
50 they had had surgery or not. Although there are a minority of participants in the category of  
51 non-operative management of CES<sup>34</sup> it was decided by the study team that including them will  
52  
53  
54  
55  
56  
57  
58  
59  
60

1  
2  
3 be an opportunity to consider their input and maximise recruitment. The Delphi will be done by  
4 healthcare professionals and patients.

5  
6  
7 To achieve a priority list, we will use the “modified” Delphi method<sup>35</sup> as opposed to the  
8 “traditional” Delphi method<sup>36</sup>. Traditionally in a Delphi survey patients are asked open  
9 questions in the first round of the Delphi and the answers would constitute the outcomes rated  
10 in the second round. In the “modified” Delphi, which will be used in this study, rating the  
11 outcomes will take place over two rounds. A list of outcomes previously attained from the  
12 systematic literature review and qualitative interviews will be presented in the first round of  
13 the Delphi <sup>35</sup>. Patients can also suggest outcomes that have not been mentioned in the first  
14 round but these will not be scored. They will be considered for inclusion into the second round  
15 of the Delphi if, as judged by the CES study team, the outcome does not reflect or is not similar  
16 to another outcome already listed. The CES study team includes a patient representative.  
17 The level of anonymity will be “fully anonymised” <sup>37</sup> so participants do not know the identities  
18 of other individuals in the group and they will not know the specific answers other individuals  
19 give. In round 2 of the Delphi, participants will know the group responses from the patient  
20 group and the healthcare professional group. Individual participants can decide to keep their  
21 original rating or to change their rating in the next round. This will lead to the group converging  
22 on a consensus opinion over the course of these two rounds <sup>37</sup>.  
23  
24  
25  
26  
27  
28  
29  
30  
31  
32  
33  
34  
35  
36  
37

### 38 **Inclusion criteria**

39  
40 Participants will be recruited from two key stakeholder groups: patients and healthcare  
41 professionals. All participants will be adults over 18 years of age and able to complete an online  
42 survey in the English language.  
43

44  
45 *Patients-* Participants who have had an operation for CES.

46  
47 *Healthcare Professionals-* All members of the clinical team involved in directly caring for a  
48 patient with CES such as:  
49

- 50
- 51 • Spinal surgeons
- 52
- 53 • Spinal specialist nurses
- 54
- 55 • Neuro-rehabilitation doctors
- 56
- 57
- 58
- 59
- 60

## Sampling and Recruitment

*Patients-* At the main site the clinical care team have a pre-existing database of CES patients they have clinically managed. The clinical care team will send an invitation letter to the home address of these patients. There will be no follow up calls or further correspondence. It is the patient's decision if they wish to be involved and the invitation will contain details of the website address patients can access if they wish to find out more details regarding the study. Online patient groups for CES will be contacted internationally. A named contact for each group will act as the liaison member to circulate the participant invitation email and poster. This may include the patient groups sharing the recruitment details on social media.

*Healthcare Professionals-* The main study site has spinal MDT (multi-disciplinary team) meetings held weekly. The coordinator has a pre-set mailing list that goes to healthcare professionals involved in the meeting. This will be used to send the participant invitation email. The membership of national and international associations will be contacted and invited to participate. They include different healthcare professionals in their membership categories.

Some examples are listed below:

- Society of British Neurological Surgeons (SBNS)
- British Association of Spine Surgeons (BASS)
- World Federation of Neuro-rehabilitation (WFNR)
- Spinal Injuries Association (SIA)

Known contacts of the CES study group will be contacted and invited to participate. Snowballing sampling will be used to increase the sample size. The participant invitation email/ letter will be the first contact for healthcare professionals and patients, which is a short introduction and summary of the study. If they are interested further the participant can proceed to the registration website for further details and obtain a copy of the participant information leaflet.

## Sample Size

There are no strict recommendations for the number of participants (patients and healthcare

professionals) required in a Delphi study to gain consensus<sup>37</sup>. In general, having more participants will increase the reliability of the group judgement<sup>38</sup>. A pragmatic approach to sample size will be taken and all individuals who meet the inclusion criteria as identified above will be invited to participate. The recruitment phase will be 2 months before the first round of the Delphi survey is released. Documentation of the organisations who distribute the Delphi invitation from each stakeholder group will be recorded. No further participants will be invited after the first round of the Delphi.

### Consent

Consent will be implicit by the participant (patients and healthcare professionals) registering their name and email address to take part in the Delphi survey via the website.

### Questionnaires

The questionnaire is constructed and delivered in an online format using the DelphiManager software developed by the COMET initiative. Before starting the questionnaire, the participant will be asked to clarify which of the two stakeholder groups they belong to. For each stakeholder group, specific information will be collected:

- *Patients*- Age, gender, location, surgery for CES- yes/no, years since surgery for CES, employed- full time/ employed- part time/ unemployed
- *Healthcare professionals*- Practicing Field (spinal surgeon, specialist nurse, neuro-rehabilitation etc), years in practice, location, gender

Following confirmation of their eligibility to participate in the study, participants will be sent an on-line link to access the first round of the Delphi process. Instructions of how to complete the questionnaire will be included at the beginning of each round. Only participants who respond to the 1<sup>st</sup> round of the Delphi will be invited to participate in 2<sup>nd</sup> round taking the assumption that if they had not participated in the first round they would be unwilling to participate in the second round. Data will be collected over at least a 4-week period for each round of the Delphi process. Participants who have not completed the survey will be sent reminders via email when they have 2 weeks, 1 week and 48 hours remaining for completion of the survey. Participants

1  
2  
3 who have not completed the questionnaire within 4 weeks of the start will be deemed not to  
4 have completed that round of the Delphi. The language used by patients in the qualitative  
5 interviews will be used to help term the outcomes for the Delphi. Plain language summaries by  
6 the COMET Patient Participation, Involvement and Engagement (PoPPiE) group was used to  
7 develop the Delphi information sheet. The Delphi will be piloted with 2 participants from each  
8 stakeholder group to highlight any issues with understanding or validity.  
9  
10  
11  
12  
13  
14  
15

### 16 **Scoring**

17 For an outcome to be included in the core outcome set there must be a majority agreement of  
18 the critical importance of the outcome and minority agreement that the outcome is not  
19 important<sup>39</sup>. This is in par with the GRADE (Grading of Recommendations Assessment,  
20 Development and Evaluation) working group recommendations  
21 (<http://www.gradeworkinggroup.org>;<sup>40 41</sup>. At the beginning of the Delphi, participants will be  
22 reminded the importance of completing the entire Delphi process. Round one of the Delphi  
23 study we will ask participants to rate each outcome using a 9 point Likert scale. This scoring  
24 system was chosen after previous studies and expert databases showed it differentiates the  
25 most between questionnaire items<sup>16 37</sup>. 7-9 indicates critical importance. 4 to 6 represents  
26 outcomes that are important but not critical whilst 1 to 3 are deemed to be of limited  
27 importance. All outcomes will be carried through to second round with anonymised feedback of  
28 first round scores from the patient group and from the healthcare professional group displayed  
29 for each outcome. The feedback will show the cumulated scores from each stakeholder group  
30 for each outcome and the participant will be asked to rate the outcomes again using the same 9  
31 point Likert scale. If they change their score on the second round they will have the opportunity  
32 to explain their reasoning for this. Outcomes which have been suggested in round 1 by the  
33 participants and deemed appropriate by the study group will then be entered in for rating in  
34 the second round by key stakeholders. After the final Delphi round, there will be a list  
35 developed from all stakeholder groups, which will be submitted to a face to face consensus  
36 meeting of key stakeholders to discuss what outcomes that should be finally included in the  
37 core outcome set. All participants who had completed both rounds of the Delphi survey will be  
38  
39  
40  
41  
42  
43  
44  
45  
46  
47  
48  
49  
50  
51  
52  
53  
54  
55  
56  
57  
58  
59  
60



eligible for invitation to the consensus meeting. A trained independent facilitator would chair this meeting.

### Analysis

Consensus that an outcome should be included in the core outcome set is defined as 70% or more scoring it as 7 to 9 and fewer than 15% scoring it as 1 to 3, which has been seen to be successful with the development of other core outcome sets<sup>42 43</sup> (**Table 4**). This will be done for each stakeholder group. Results at the multiple rounds of the Delphi process and consensus meeting will be documented to include the number of participants invited, number completing the section, measure of each group response to an outcome leading to a comprehensive list of all outcomes that should be included in the COS CES.

**Table 4.** Definitions of a consensus

| Classification of consensus | Description                                                           | Definition                                                                                                    |
|-----------------------------|-----------------------------------------------------------------------|---------------------------------------------------------------------------------------------------------------|
| <b>IN</b>                   | Consensus that outcome should be included in the core outcome set     | 70% or more participants scoring as 7 to 9 AND <15% participants scoring as 1 to 3 in both stakeholder groups |
| <b>OUT</b>                  | Consensus that outcome should not be included in the core outcome set | 50% or less participants scoring 7 to 9 in both stakeholder groups                                            |
| <b>NO CONSENSUS</b>         | Uncertainty about importance of outcome                               | Anything else                                                                                                 |

### Attrition

It is expected that some participants will drop out after each round of the Delphi. Each participant will be given a unique participant number when they complete the first round of the Delphi, which will allow calculation of the attrition rates between rounds. This will allow

1  
2  
3 identification of participants who have completed all rounds and see if there is any difference  
4 bias between those participants who complete the process. Mean round 1 scores for the  
5 participants who completed round 1 and round 2 will be compared with those that dropped out  
6 after round 1.  
7  
8  
9

#### 10 11 12 **Phase 4: Consensus Meeting** 13

14  
15  
16 All participants registering for the Delphi survey will be asked if they would be happy to attend  
17 a face to face consensus meeting involving patients and healthcare professionals. They will  
18 need to complete both rounds of the Delphi survey to be eligible to attend. This would be set  
19 up as a tick box on the registration page for the online Delphi.  
20  
21

22  
23 40 participants will be invited to the consensus meeting. This will include 20 healthcare  
24 professionals and 20 patients. Out of the 40 participants; 30 will be from the UK and 10 will be  
25 international. Standard travel expenses and hotel accommodation will be reimbursed or  
26 provided. 10 of the participants at the consensus meeting will be invited before the Delphi  
27 survey is released to attend the consensus meeting but on the premise, that both rounds of the  
28 Delphi are completed. This is to make sure there is representation at the consensus meeting  
29 from key stakeholder organisations closely involved with CES patients, research or  
30 management. 30 participants at the consensus meeting will be those who have completed both  
31 rounds of the Delphi and ticked their interest to attend the consensus meeting during  
32 registration.  
33  
34  
35  
36  
37  
38  
39  
40  
41  
42

43 In the development of a breast reconstruction core outcome set patients and professionals  
44 were recruited in a 2:1 ratio so that patients' views were represented preferentially as the  
45 procedure is a patient selected optional intervention<sup>44</sup>. In our study, clinical intervention for  
46 cauda equina syndrome is performed as an emergency so it was deemed appropriate by the  
47 study team to have a 1:1 ratio of patients and healthcare professionals. This is to maximise the  
48 number of participants involved to help achieve consensus. In addition, the core outcome set  
49 should reflect all key stakeholders input equally. If there is an overwhelming response with  
50  
51  
52  
53  
54  
55  
56  
57  
58  
59  
60

1  
2  
3 more than 40 participants interested in attending the consensus meeting the study team will  
4 apply stratified purposive sampling. On the day of the consensus meeting informed consent will  
5 be obtained from the patient participants.  
6  
7

8 Outcomes categorised as “consensus in” across both stakeholder groups from the Delphi survey  
9 **(Table 4)** will be included in the final core outcome set. Outcomes categorised as “consensus  
10 out” across both stakeholder groups from the Delphi survey will be excluded from the final core  
11 outcome set. Results of the Delphi survey will be discussed at the consensus meeting and the  
12 main discussion will be regarding the outcomes deemed as achieving “no consensus” in the  
13 Delphi survey. Participants at the meeting will vote on these outcomes. The same criteria for  
14 consensus used in the Delphi survey **(Table 4)** will be used in the consensus meeting. All  
15 outcomes that reach “consensus in” will be included in the core outcome set. All outcomes in  
16 the “consensus out” or “no consensus” category after voting in the consensus meeting will not  
17 be included in the core outcome set. If there is no agreed final core outcome set at the end of  
18 the first meeting subsequent meetings will be arranged for this to happen. The participants  
19 who had completed both rounds of the Delphi survey would be invited to attend another  
20 consensus meeting if required.  
21  
22  
23  
24  
25  
26  
27  
28  
29  
30  
31  
32  
33

## 34 **PATIENT INVOLVEMENT**

35  
36  
37  
38 Patients will be involved in the design, review and recruitment of the study. The scope of the  
39 research question will be decided with the study team that includes 2 research partners who  
40 are patients with CES. The qualitative interviews will be trailed with the patient research  
41 partners and the topic guide will be reviewed by them. Pilot testing of the Delphi survey will be  
42 done by the patient research partners who will be asked to review the patient explanations of  
43 the outcomes and the questions on the registration page. Patients will be involved in the  
44 recruitment stage of the Delphi as they will be requested via social media to forward the  
45 website link for the Delphi survey to any relevant known contacts.  
46  
47  
48  
49  
50  
51  
52  
53

## 54 **ETHICS AND DISSEMINATION**

1  
2  
3  
4  
5 REC and HRA approval was obtained on the 6 December 2016 for the qualitative interviews  
6 from South Central - Hampshire A Research Ethics Committee. REC reference 16/SC/0587. REC  
7 and HRA approval was obtained on 26 March 2018 for the Delphi process and consensus  
8 meeting from North West- Greater Manchester Central Research Ethics Committee. REC  
9 reference was 18/NW/0022. We intend to publish the results of the core outcome set for  
10 patients with CES in an open access journal. It will also be made available through the CES  
11 patient charity websites. Results will be disseminated through International and national  
12 presentations. The next step would be to identify the appropriate measurement instrument for  
13 each of the outcomes in the core outcome set <sup>45</sup>. Core outcome sets are developed in a number  
14 of clinical areas and their use is advocated in the UK by the National Institute for Health  
15 Research (NIHR) Health Technology Assessment (HTA), Cochrane Reviews of the effects of  
16 Healthcare intervention <sup>46</sup> and by World Health Organisation (WHO) handbook for guideline  
17 development <sup>17</sup>. The NIHR HTA has added this statement to their application form, "Where  
18 established core outcomes exist they should be included among the list of outcomes unless  
19 there is a good reason to do otherwise." By developing the CES core outcome set we intend to  
20 reduce outcome reporting bias, heterogeneity, and improve the quality of research studies in  
21 CES. This will allow us to synthesise the data and make more robust evidence based decisions  
22 regarding the management of CES.  
23  
24  
25  
26  
27  
28  
29  
30  
31  
32  
33  
34  
35  
36  
37  
38  
39

#### 40 **Author Contributions**

41 NS, MW, SC conceived the project. TM is the principal investigator for the study. NS is the  
42 clinical research fellow responsible for management of the project, wrote the protocol and  
43 manuscript. TM, PW, AN, MW, SC provide supervision, have input in all aspects of the project,  
44 commented on drafts of the manuscript. All authors have read and approved the manuscript.  
45 Special thanks to Ms Claire Thornber and Mr Steven Smith as patient research partners in this  
46 study.  
47  
48  
49  
50  
51  
52  
53

#### 54 **Funding**

The paper is independent research funded by the Walton Centre Research Funds and Royal College of Surgeons Research Fellowship.

### Competing Interests

None Declared

### Supplementary file 1- Topic guide

**Figure 1.** The overall study timeline

### REFERENCES

1. Kostuik JP. Controversies in cauda equina syndrome and lumbar disk herniation. *Current Opinion in Orthopaedics* 1993;4(2):125-28.
2. Gardner A, Gardner E, Morley T. Cauda equina syndrome: A review of the current clinical and medico-legal position. *Eur Spine J* 2011;20(5):690-97. doi: <http://dx.doi.org/10.1007/s00586-010-1668-3>
3. Gitelman A, Hishmeh S, Morelli BN, et al. Cauda equina syndrome: a comprehensive review. *Am J Orthop (Belle Mead NJ)* 2008;37(11):556-62.
4. Gleave JR, Macfarlane R. Cauda equina syndrome: what is the relationship between timing of surgery and outcome? *Br J Neurosurg* 2002;16(4):325-8.
5. Sorbie C. Cauda equina syndrome. *Orthopedics* 2009;32(6):397. doi: <http://dx.doi.org/10.3928/01477447-20090511-31>
6. Taskforce TNS. Commissioning Spinal Services - Getting The Service Back On Track . January 2013
7. Todd NV. Cauda equina syndrome: The timing of surgery probably does influence outcome. *Br J Neurosurg* 2005;19(4):301-06. doi: <http://dx.doi.org/10.1080/02688690500305324>
8. Srikandarajah N, Boissaud-Cooke MA, Clark S, et al. Does early surgical decompression in cauda equina syndrome improve bladder outcome? *Spine (03622436)* 2015;40(8):580-83. doi: 10.1097/BRS.0000000000000813
9. Ahn UM, Ahn NU, Buchowski JM, et al. Cauda equina syndrome secondary to lumbar disc herniation. *Spine* 2000;25(12):1515-22. doi: <http://dx.doi.org/10.1097/00007632-200006150-00010>
10. Daniels EW, Gordon Z, French K, et al. Review of medicolegal cases for cauda equina syndrome: what factors lead to an adverse outcome for the provider? *Orthopedics* 2012;35(3):200-00. doi: 10.3928/01477447-20120222-15
11. Williamson PR, Altman DG, Bagley H, et al. The COMET handbook: version 1.0. *Trials* 2017;18(3):280.

12. Armstrong R, Hall BJ, Doyle J, et al. 'Scoping the scope' of a cochrane review. *Journal of Public Health* 2011;33(1):147-50.
13. Williamson PR, Altman DG, Blazeby JM, et al. Developing core outcome sets for clinical trials: issues to consider. *Trials* 2012;13(1):132.
14. Kirkham JJ, Gargon E, Clarke M, et al. Can a core outcome set improve the quality of systematic reviews?—a survey of the Co-ordinating Editors of Cochrane Review Groups. *Trials* 2013;14(1):21.
15. Tugwell P, Boers M, Brooks P, et al. OMERACT: an international initiative to improve outcome measurement in rheumatology. *Trials* 2007;8(1):38.
16. COMET. The COMET Initiative. 2018
17. Williamson PR, Altman DG, Blazeby JM, et al. The COMET (core outcome measures in effectiveness trials) initiative. *Trials* 2011;12(Suppl 1):A70.
18. Kirkham JJ, Davis K, Altman DG, et al. Core Outcome Set-STAndards for Development: The COS-STAD recommendations. *PLoS medicine* 2017;14(11):e1002447.
19. Young B, Bagley H. Including patients in core outcome set development: issues to consider based on three workshops with around 100 international delegates. *Research Involvement and Engagement* 2016;2(1):25.
20. Srikandarajah N, Wilby M, Clark S, et al. Outcomes reported after surgery for Cauda Equina Syndrome: A Systematic Literature Review. *Spine* 2018
21. Moher D, Liberati A, Tetzlaff J, et al. Preferred reporting items for systematic reviews and meta-analyses: the PRISMA statement. *PLoS medicine* 2009;6(7):e1000097.
22. Kostuik JP. Medicolegal consequences of cauda equina syndrome: an overview. *Neurosurg* 2004;16(6):e8.
23. Dodd S, Clarke M, Becker L, et al. A taxonomy has been developed for outcomes in medical research to help improve knowledge discovery. *Journal of clinical epidemiology* 2018;96:84-92.
24. Keeley T, Khan H, Pinfold V, et al. Core outcome sets for use in effectiveness trials involving people with bipolar and schizophrenia in a community-based setting (PARTNERS2): study protocol for the development of two core outcome sets. *Trials* 2015;16(1):47.
25. Elo S, Kyngäs H. The qualitative content analysis process. *Journal of advanced nursing* 2008;62(1):107-15.
26. Quinn Patton M. *Qualitative Research* John Wiley & Sons: Ltd, 2005.
27. Gleave JRW, Macfarlane R. Cauda equina syndrome: What is the relationship between timing of surgery and outcome? *Br J Neurosurg* 2002;16(4):325-28. doi: <http://dx.doi.org/10.1080/0268869021000032887>
28. Ritchie J, Lewis J, Nicholls CM, et al. *Qualitative research practice: A guide for social science students and researchers*: Sage 2013.
29. Britten N. Qualitative research: qualitative interviews in medical research. *Bmj* 1995;311(6999):251-53.
30. Braun V, Clarke V. Using thematic analysis in psychology. *Qualitative research in psychology* 2006;3(2):77-101.
31. Charmaz K. *Constructing grounded theory: A practical guide through qualitative analysis*: Sage 2006.
32. Smith JA, Flowers P, Larkin M. *Interpretative phenomenological analysis: Theory, method and research* 2009.

33. Tong A, Sainsbury P, Craig J. Consolidated criteria for reporting qualitative research (COREQ): a 32-item checklist for interviews and focus groups. *International journal for quality in health care* 2007;19(6):349-57.
34. Khurana R, Arora SK, Hemal A, et al. Successful non-operative management of cauda equina syndrome in a case of thalassemia major. *Pediatric Hematology Oncology Journal* 2016;1(2):41-43.
35. Keeley T, Williamson P, Callery P, et al. The use of qualitative methods to inform Delphi surveys in core outcome set development. *Trials* 2016;17(1):230.
36. Hasson F, Keeney S, McKenna H. Research guidelines for the Delphi survey technique. *Journal of advanced nursing* 2000;32(4):1008-15.
37. Sinha IP, Smyth RL, Williamson PR. Using the Delphi technique to determine which outcomes to measure in clinical trials: recommendations for the future based on a systematic review of existing studies. *PLoS medicine* 2011;8(1):e1000393.
38. Murphy M. Consensus development methods and their use in clinical guideline development. *Health Technol Assess* 1998;2:1-88.
39. Jaeschke R, Guyatt GH, Dellinger P, et al. Use of GRADE grid to reach decisions on clinical practice guidelines when consensus is elusive. *BMJ: British Medical Journal (Online)* 2008;337
40. Atkins D, Best D, Briss PA, et al. Grading quality of evidence and strength of recommendations. *BMJ (Clinical research ed)* 2004;328(7454):1490-90.
41. Guyatt GH, Oxman AD, Vist GE, et al. GRADE: an emerging consensus on rating quality of evidence and strength of recommendations. *BMJ (Clinical research ed)* 2008;336(7650):924-26.
42. Harman NL, Bruce IA, Callery P, et al. MOMENT—Management of Otitis Media with Effusion in Cleft Palate: protocol for a systematic review of the literature and identification of a core outcome set using a Delphi survey. *Trials* 2013;14(1):70.
43. Haywood K, Griffin X, Achten J, et al. Developing a core outcome set for hip fracture trials. *Bone Joint J* 2014;96(8):1016-23.
44. Potter S, Holcombe C, Ward J, et al. Development of a core outcome set for research and audit studies in reconstructive breast surgery. *British Journal of Surgery* 2015;102(11):1360-71.
45. Prinsen CA, Vohra S, Rose MR, et al. How to select outcome measurement instruments for outcomes included in a “Core Outcome Set”—a practical guideline. *Trials* 2016;17(1):449.
46. Rosenbaum SE, Glenton C, Oxman AD. Summary-of-findings tables in Cochrane reviews improved understanding and rapid retrieval of key information. *Journal of clinical epidemiology* 2010;63(6):620-26.

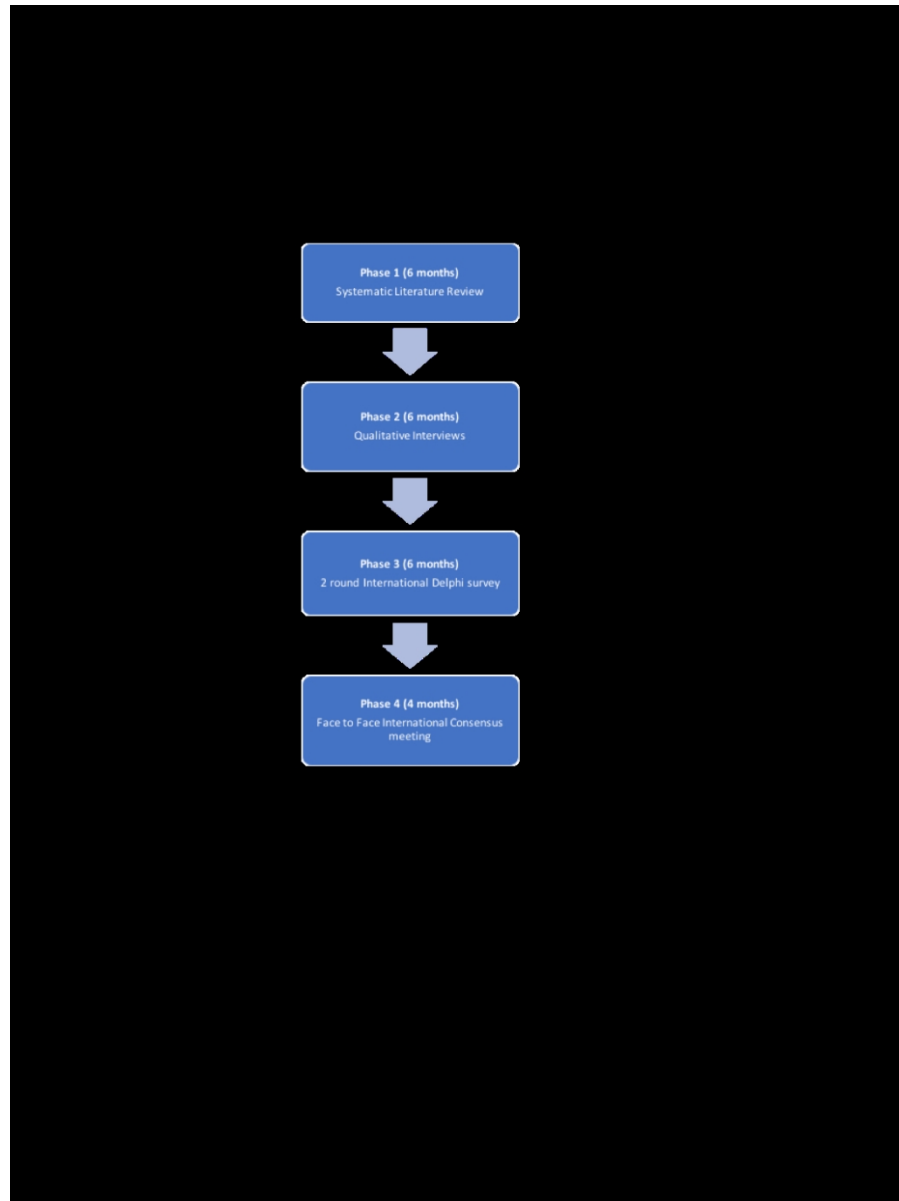

Figure 1. The overall study timeline



## TOPIC GUIDE CES QUALITATIVE INTERVIEWS

### Aims and Objectives

- To explore the patient experience of living with Cauda Equina Syndrome (CES)
- To ascertain what the patient feels are the most important outcomes that they are experiencing
- To ascertain what outcomes the patient feels are the most important to research in to improve CES management and aftercare
- To determine who should be key stakeholders
- Identify appropriate language to use for patient Delphi iterative process.

### Introduction (5-10 mins)

Interviewer Name

Interviewer Occupation

Explain basic definition of CES

Explain looking for challenges experienced after the operation for CES

Explain expected intention, sensitive subjects and duration of interview and confidentiality

Confirm consent to qualitative interview

### Background (<5 mins)

Interviewee name

Interviewee age

Interviewee occupation

Other medical conditions

When was your operation for CES?

### Interview questions (30 mins)

How has your experience of this condition; Cauda Equina Syndrome been?

- What was it like before the back operation?

- What was it like after the back operation?

How do you feel your condition has been managed in hospital and in the community?

What were your expectations of life health-wise after the operation and what is the reality like?

IRAS: 201946 Version: 1.1 Date: 23/09/16

1  
2  
3 Due to this condition what do you feel are the challenges to your health and  
4 wellbeing?

- 5 -bowel/bladder  
6  
7 -sex life  
8  
9 -back/ leg pain  
10  
11 -psychological  
12  
13 -anxiety/fear  
14  
15 -other

16  
17 Would you be able to prioritise the importance of these for you now?

18  
19 Was the importance of these different at earlier stages of the condition? (More  
20 relevant to those in the long term CES category)

21  
22 Through this process of living with CES who else do you think has a good handle  
23 on the condition? If anyone? -Gauge other potential key stakeholders

24  
25 Tell me a bit about the support you had for the condition?

26  
27 **Closing remarks (5 mins)**

28  
29 Considering your hospital, post op and follow up experience what would you  
30 have liked to change?

- 31 -support services  
32  
33 -more streamlined service with dedicated clinics  
34  
35 -research into timing for CES operations  
36  
37 -follow up as to the effects of long term CES

38  
39 Offer the opportunity for the participant to comment on their interview  
40 transcript after transcription.  
41  
42  
43  
44  
45  
46  
47  
48  
49  
50  
51  
52  
53  
54  
55  
56  
57  
58  
59  
60

# BMJ Open

## PROTOCOL FOR THE DEVELOPMENT OF A CORE OUTCOME SET FOR CAUDA EQUINA SYNDROME: SYSTEMATIC LITERATURE REVIEW, QUALITATIVE INTERVIEWS, DELPHI SURVEY AND CONSENSUS MEETING

|                                 |                                                                                                                                                                                                                                                                                                                                                                                                                                                                                              |
|---------------------------------|----------------------------------------------------------------------------------------------------------------------------------------------------------------------------------------------------------------------------------------------------------------------------------------------------------------------------------------------------------------------------------------------------------------------------------------------------------------------------------------------|
| Journal:                        | <i>BMJ Open</i>                                                                                                                                                                                                                                                                                                                                                                                                                                                                              |
| Manuscript ID                   | bmjopen-2018-024002.R2                                                                                                                                                                                                                                                                                                                                                                                                                                                                       |
| Article Type:                   | Protocol                                                                                                                                                                                                                                                                                                                                                                                                                                                                                     |
| Date Submitted by the Author:   | 08-Feb-2019                                                                                                                                                                                                                                                                                                                                                                                                                                                                                  |
| Complete List of Authors:       | Srikandarajah, Nisaharan; University of Liverpool, Institute of Translational Medicine<br>Noble, Adam; University of Liverpool, Institute of Psychology Health and Society<br>Wilby, Martin; The Walton Centre NHS Foundation Trust, Neurosurgery<br>Clark, Simon; The Walton Centre NHS Foundation Trust, Neurosurgery<br>Williamson, Paula; University of Liverpool , Institute of Translational Medicine<br>Marson, Anthony; University of Liverpool, Institute of Translational Medicine |
| <b>Primary Subject Heading</b>: | Neurology                                                                                                                                                                                                                                                                                                                                                                                                                                                                                    |
| Secondary Subject Heading:      | Medical management, Patient-centred medicine, Qualitative research, Research methods, Surgery                                                                                                                                                                                                                                                                                                                                                                                                |
| Keywords:                       | Cauda Equina Syndrome, Core Outcome Set, Delphi, Systematic Literature Review, Qualitative Interviews, Consensus                                                                                                                                                                                                                                                                                                                                                                             |
|                                 |                                                                                                                                                                                                                                                                                                                                                                                                                                                                                              |

SCHOLARONE™  
Manuscripts

1  
2  
3 **PROTOCOL FOR THE DEVELOPMENT OF A CORE OUTCOME SET FOR CAUDA EQUINA**  
4 **SYNDROME: SYSTEMATIC LITERATURE REVIEW, QUALITATIVE INTERVIEWS, DELPHI**  
5 **SURVEY AND CONSENSUS MEETING**  
6  
7  
8  
9

10 **Nisaharan Srikandarajah\***, **Adam J Noble•**, **Martin Wilby§**, **Simon Clark§**, **Paula R**  
11 **Williamson\***, **Anthony Guy Marson\***  
12  
13  
14

15  
16 **Institute**

17  
18 \*Institute of Translational Medicine, University of Liverpool, Liverpool, United Kingdom;  
19 Department of Neurosurgery  
20 §Walton Center NHS Foundation Trust, Liverpool, United Kingdom  
21 •Institute of Psychology Health and Society, University of Liverpool, Liverpool, United  
22 Kingdom.  
23  
24  
25

26 **Email address**

27  
28 Nisaharan Srikandarajah- nishsri09@gmail.com

29 Martin Wilby- martin.wilby@thewaltoncentre.nhs.uk

30  
31 Simon Clark- simon.clark@thewaltoncentre.nhs.uk

32  
33 Adam Noble- adam.noble@liv.ac.uk

34  
35 Paula Williamson- prw@liv.ac.uk

36  
37 Tony Marson- marjon01@liv.ac.uk  
38  
39

40 **Keywords**

41  
42 Cauda Equina Syndrome, Surgery, Outcomes, Core Outcome Set, Systematic Literature  
43 Review, Qualitative Interviews, Delphi Survey, Consensus Meeting  
44  
45  
46  
47

48 **Corresponding Author**

49 Mr Nisaharan Srikandarajah, Spinal Research Team, Room 2:29, Clinical Sciences Center,  
50 University of Liverpool, Lower Lane, Liverpool, UK, L9 7LJ  
51  
52

53 E-mail: nishsri09@gmail.com

54  
55 Telephone: 01515295945  
56  
57

58 **Word Count 5,480**  
59  
60

## ABSTRACT

### Introduction

Cauda Equina Syndrome (CES) is a serious neurological condition most commonly due to compression of the lumbosacral nerve roots, which can result in significant disability. The evidence for acute intervention in CES is mainly from retrospective studies. There is heterogeneity in the outcomes chosen for analysis in these studies, which makes it difficult to synthesise the data across studies. This study will develop a core outcome set for use in future studies of CES, engaging with key stakeholders and using transparent methodology. This will help ensure that relevant outcomes are used in future, and will facilitate attempts to summarise data across studies in systematic reviews.

### Methods and Analysis

A systematic literature review will document all the outcomes for CES after surgery mentioned in the literature. The qualitative interviews with CES patients will be semi structured, audio recorded, transcribed and thematically analysed with the use of NVivo version 10 to identify outcomes and determine the themes described. The outcomes from the literature review and patient interviews will be combined and prioritised to determine what the most important outcomes are in CES research studies to patients and healthcare professionals. The prioritisation will be done through a two-round iterative Delphi survey and a consensus meeting. This process will decide the core outcome set for patients with CES.

### Ethics and Dissemination

REC and HRA approval was obtained on the 6/12/16 for the qualitative interviews from South Central - Hampshire A REC. REC reference 16/SC/0587. REC and HRA approval was obtained on 26/3/18 for the Delphi process and consensus meeting from North West- Greater Manchester Central REC. REC reference was 18/NW/0022. The final core outcome set will be published and freely available.

### Registration Details

This study is registered with the Core Outcome Measures in Effectiveness Trials (COMET) database as study 824.

### Strengths and Limitations of the Study

- A systematic literature review following PRISMA guidelines will identify outcomes in the existing literature for Cauda Equina Syndrome (CES).
- Semi-structured qualitative interviews using a sampling frame to select a varied sample of CES patients will identify outcomes important to them.
- The consensus process of an international online Delphi survey and an international face to face consensus meeting will involve patients and healthcare professionals.
- A core outcome set will allow future CES research studies to use outcomes relevant to key stakeholders and allow synthesis of data in CES.
- The outcomes that constitute the core outcome set will be reported. “How” these outcomes are measured will not be determined in this study and requires further work.

### INTRODUCTION

Cauda equina syndrome (CES) is due to dysfunction of the lumbosacral nerve roots beneath the conus medullaris resulting in sensory-motor deficits of the lower limbs and sphincter dysfunction. Symptoms and signs include low back pain, unilateral or bilateral sciatica, saddle anaesthesia and motor weakness of the lower extremities with bladder and/or bowel dysfunction<sup>1 2</sup>. The most common cause of CES is a herniated lumbar disc, and represents 2% of all herniated lumbar discs. CES has an incidence of 2 per 100,000 in England and is an indication for emergency decompression surgery<sup>3 4 5</sup>. Other less common etiologies include spinal stenosis, spinal tumours, hematomas, fractures, and infections<sup>2</sup>. The National Spinal Task Force showed that there are 981 operations done each year for CES in the UK from 2010 to 2011<sup>6</sup>. Surgical intervention for CES is not a rare procedure and the economic burden of severe disability is a worrying unknown for both patient quality of life and development of appropriate health services.

The evidence for acute intervention in CES is mainly from retrospective studies<sup>7 8</sup>. The importance of categorising CES into CES incomplete (CESI) and CES complete with urinary retention (CESR) has been highlighted in the literature<sup>4</sup>. CESR describes painless urinary

1  
2  
3 retention with overflow incontinence and complete perianal sensory loss. When the patient  
4 complains of CESI, the symptoms include urinary issues of neurogenic origin including loss of  
5 desire to void, altered urinary sensation, and hesitancy with partial saddle anaesthesia.  
6  
7  
8  
9

10 It is documented in the literature that timely operative decompression for CES secondary to  
11 herniated lumbar disc can lead to improved outcomes in patients<sup>9 7 8</sup>. In fact, delay or  
12 missed diagnosis of this condition incurs heavy litigation costs to the NHS at £336,000 (US  
13 \$549,427) per case on average<sup>10</sup> as reported to the Medical Defence Union in the UK.  
14  
15  
16  
17  
18

### 19 **Rationale for the development of a “Core Outcome Set” (COS)**

20  
21  
22 An “outcome” in relation to clinical research studies is defined to be a measurement or  
23 observation used to capture and assess the effect of treatment such as assessment of the  
24 side effects (risk) or effectiveness (benefits).<sup>11</sup>  
25  
26  
27  
28

29 Before the systematic literature review a scoping review was undertaken<sup>12</sup>. It was identified  
30 that there were no randomised controlled trials, many retrospective observational studies  
31 and few prospective studies reporting the clinical outcome of patients with CES. There is  
32 heterogeneity and inconsistency in the outcomes reported in the literature for CES. The  
33 outcomes reported in the literature have not been independently validated as important to  
34 key stakeholders.  
35  
36  
37  
38  
39

40 There is no defined core outcome set in cauda equina syndrome (CES) currently and this  
41 protocol will describe the methods of how to develop it. A core outcome set defines the  
42 minimum outcomes that should be consistently measured and reported in clinical trials in a  
43 specific area of healthcare<sup>13</sup>. With this there will be greater reporting consistency and a  
44 reduction in outcome reporting bias in healthcare studies contributing to systematic reviews  
45 and meta-analysis<sup>14</sup> that can lead to informed healthcare decisions.  
46  
47  
48  
49

50  
51 Initially, a systematic literature review and qualitative patient interviews will be conducted  
52 to document the outcomes for CES patients after surgery. These outcomes will be combined  
53 and prioritised through two rounds of a Delphi process with key stakeholders and a  
54 consensus meeting to decide the core outcome set. The core outcome set would be  
55 published and used for future research studies and improving outcome reporting in CES.  
56  
57  
58  
59  
60

The development of core outcome sets has been done successfully in rheumatology with the OMERACT group (Outcomes Measures in Rheumatoid Arthritis Clinical Trials). This international collaboration was developed in the early 1990s involving patients in the development of core outcome sets and has improved consistency of reported trials in this speciality<sup>14 15</sup>. The Core Outcome Measures in Effectiveness Trials (COMET) initiative advocates the involvement of patients and currently holds a database of on-going core outcome set developers<sup>16</sup> to minimise duplication and foster health service user engagement<sup>13 17</sup>.

### Scope of the COS

We aim to identify “what” outcomes of patients with CES are of concern to key stakeholders using transparent methodology. We are not intending to consider how these outcomes should be measured. The 11 minimum Core Outcome Set Standards for Development (COS-STAD) recommendations are addressed in this protocol<sup>18</sup> (**Table 1**).

**Table 1. COS-STAD recommendations**

| Domain                | Standard Number | Methodology                                                             | Notes                                                                                                            |
|-----------------------|-----------------|-------------------------------------------------------------------------|------------------------------------------------------------------------------------------------------------------|
| Scope Specification   | 1               | The research or practice setting in which the COS is to be applied      | Research studies that will inform clinical decision making                                                       |
|                       | 2               | The health condition(s) covered by the COS                              | All severities of Cauda Equina Syndrome                                                                          |
|                       | 3               | The population(s) covered by the COS                                    | Human adults aged 18 or above                                                                                    |
|                       | 4               | The intervention(s) covered by the COS                                  | Clinical management of CES including surgery                                                                     |
| Stakeholders involved | 5               | Those who will use the COS in research                                  | Clinical trialists in CES are healthcare professionals who manage CES patients. They are included in standard 6. |
|                       | 6               | Healthcare professionals with experience of patients with the condition | This will include clinicians, experts and healthcare professionals involved in CES management                    |



|                   |    |                                                                                          |                                                                                                                                       |
|-------------------|----|------------------------------------------------------------------------------------------|---------------------------------------------------------------------------------------------------------------------------------------|
|                   | 7  | Patients with the condition or their representatives                                     | Patients with a diagnosis of CES will be included <sup>19</sup>                                                                       |
| Consensus Process | 8  | The initial list of outcomes considered both healthcare professionals and patients views | Systematic Literature review <sup>20</sup> considered healthcare professional views. Qualitative interviews considered patient views. |
|                   | 9  | A scoring process and consensus definition were described a priori                       | Described in “Scoring” and “Analysis” section of this protocol                                                                        |
|                   | 10 | Criteria for including/dropping/adding outcomes were described a priori                  | Described in “Analysis” section of this protocol                                                                                      |
|                   | 11 | Care was taken to avoid ambiguity of language used in the list of outcomes               | Plain language and clinical explanations available. These will be pilot tested with patients and healthcare professionals.            |

### Registration

The study is registered on the COMET database as study 824 (<http://www.comet-initiative.org/studies/details/824?result=true>).

## METHODS AND ANALYSIS

Development of the core outcome set will be developed in four phases with their estimated time frames highlighted in the overall study timeline (**Figure 1**). Timeframes includes the estimated duration for ethical approval, study recruitment and analysis.

### *Phase 1: Systematic Literature Review*

#### **Research Question**

What outcomes are reported in the medical literature after surgery for CES?

#### **Summary**

The aim of the systematic literature review was to summarise the reporting standards of the clinical outcomes after surgery in CES patients following the PRISMA guidelines<sup>21</sup>. Most CES cases are due to lumbar disc herniation<sup>22</sup>, which requires urgent surgical intervention.

Study inclusion was limited to articles with patients who were surgically managed and whose outcomes were recorded.

The systematic literature review summarised the outcomes that had been mentioned in the literature and categorised them into a known taxonomy<sup>23</sup>. 1873 articles were identified through the search strategy of which 61 met the inclusion criteria. Inclusion criteria specified details regarding the study design, diagnosis, procedure, publication date, language and the patient age. 737 outcomes were reported verbatim in the 61 included articles. These were then categorised to 20 higher order groupings called "outcome domains." The most commonly reported outcomes were bladder function (70.5%), motor function (63.9%), and sensation (50.8%). There was significant variation in the terms used for each outcome for example, bladder function outcome domain had 141 different terms. Significant heterogeneity was evident in the outcomes reported in CES research studies. This highlighted a need for a core outcome set in CES to be developed.<sup>20</sup>

### *Phase 2: Qualitative Interviews*

#### **Research Question**

1  
2  
3 What outcomes have CES patients experienced after surgery and how do they feel about  
4 the management before and after surgery?  
5  
6  
7

## 8 9 **Method**

10 The objectives of the qualitative interviews with CES patients are:

- 11 • To explore the patient experience of living with CES.
- 12 • To document what the patient describes as the most important outcomes they are
- 13 experiencing.
- 14 • To determine what service improvements can be made to improve CES management
- 15 and aftercare.
- 16 • To determine who should be the key stakeholders in the Delphi survey.
- 17 • Identify appropriate language to use for the Delphi survey <sup>24</sup>.

18  
19  
20  
21  
22  
23  
24  
25  
26  
27  
28 These interviews will be documented with audio recorded transcripts. The list of all  
29 potential outcomes from the systematic review and qualitative interviews will be placed  
30 into outcome domains by the research team to avoid repetition by qualitative method of  
31 content analysis <sup>25</sup>. The qualitative interviews will be piloted with 2 CES patients to establish  
32 if the interview structure and technique is clear, understandable, and capable of answering  
33 the research questions. This would recognise any corrections that need to be made to the  
34 interview structure or technique. Inclusion and exclusion criteria are shown in **Table 2**.  
35  
36  
37  
38  
39  
40  
41  
42

43 **Table 2.** Inclusion and Exclusion criteria for qualitative interviews

| INCLUSION CRITERIA                                         | EXCLUSION CRITERIA                    |
|------------------------------------------------------------|---------------------------------------|
| Adult patients                                             | Adults unable to consent for research |
| Diagnosis of Cauda Equina Syndrome                         |                                       |
| Patient underwent a surgical procedure for CES             |                                       |
| Less than 10 years since the surgical procedure            |                                       |
| Ability to converse in English and to consent for research |                                       |

### Participant Selection

Adult patients for the qualitative interviews will be selected from those coded as having a diagnosis of cauda equina syndrome in the medical records. There is an existing database of cauda equina patients who have been operated on and followed up by consultants, registrars or nurse specialists depending on the next available clinic. Adult patients will be 18 years or older who have had spinal surgery to remove the compressive lesion at a single tertiary NHS institution over the past 10 years. The qualitative interviews will capture short and long term outcomes that are deemed important to them. Duration of the recorded outcomes will be calculated since the initial operation for CES.

Stratified purposive sampling<sup>26</sup> was chosen in which the aim is to select groups that display variation in particular characteristics so the subgroups can then be compared.

Characteristics known to have an impact on the outcomes being investigated have been identified- severity of CES (CESI or CESR)<sup>27</sup> then there is a subgroup about which little is known and whose circumstances and views need to be explored; short ( $\leq 2$  years) or long term ( $>2$  years and  $\leq 10$  years) since the operation (see **Table 3**). This will produce 4 subcategories to populate. This is to prevent potential bias you may get from having many patients who presented with a severe clinical picture and poor outcomes being more forthcoming and vocal. All subcategories for the sampling frame will be deemed a priority. Half the participants would ideally be male and half would be female.

**Table 3.** Sampling frame with suggested quotas

|                                                                                            | <b>CESI (Cauda Equina Syndrome Incomplete)</b> | <b>CESR (Cauda Equina Syndrome with retention)</b> |
|--------------------------------------------------------------------------------------------|------------------------------------------------|----------------------------------------------------|
| <b>Short term since the operation (<math>\leq 2</math> years)</b>                          | 10 participants                                | 10 participants                                    |
| <b>Long term since the operation (<math>&gt;2</math> years <math>\leq 10</math> years)</b> | 10 participants                                | 10 participants                                    |

There is an existing database of 200 patients with contact details and clinical details of presentation and management, which will be updated up to the current date to exclude patients who are deceased. This should produce 50 patients per category. Due to reasons

1  
2  
3 such as long travel distance from institution, not interested in participating it is anticipated  
4 that up to 10 patients may reply from each category, which would produce up to 40 patients  
5 in total. Options will be given to be interviewed at home, via electronic media (Skype), over  
6 the phone or to attend the hospital in person. After informed consent, patients will be  
7 interviewed until “data saturation” is reached. The research team will decide when data  
8 saturation is reached. Data saturation is the point where increasing the sample size no  
9 longer contributes to new evidence <sup>28</sup> moreover even large qualitative studies do not  
10 interview more than 50 people <sup>29</sup>. Additional patients will be interviewed in the  
11 subcategories if one group has a better response rate until data saturation is achieved.

12 Sticking rigidly to a sample frame could be counter-intuitive as one patient can be data rich  
13 during the interview as opposed to interviewing 5 patients where data is not rich. The aim is  
14 to collect rich data to allow in depth analysis <sup>28</sup>. So, although the sampling frame may serve  
15 as a guide it will not be used to start restricting participants especially at the initial stages of  
16 doing the qualitative interviews until data saturation is achieved.

17 An information leaflet and stamped addressed envelope to return the response slip will be  
18 sent to participants with a consent form. Patients will have 3 weeks to “opt-out” of the  
19 study by returning a response slip, through email or telephone with the research team.  
20 After this the participants will receive a phone call from the research team to confirm  
21 interest for participating in the study, to answer any further questions and to arrange a time  
22 and location for the interview.

### 23 **Interview Format and Analysis**

24 A semi-structured interview format will be utilised as per our topic guide (**Supplementary**  
25 **file 1**). Qualitative semi-structured interviews were chosen over questionnaires and focus  
26 groups as it was believed that patient opinions over sensitive subject matter such as bowel,  
27 bladder and sexual function would be better elicited in a private one to one interview and  
28 they were less likely to inhibit their contribution <sup>28</sup>. In addition, one-to-one interviews are  
29 more accessible for potential participants and for patients with mobility restrictions.  
30 Informed consent will be obtained prior to the interview where anonymity and  
31 confidentiality will be expressed. The consent will also request the patient’s permission for  
32 their general practitioner (GP) to be informed of their involvement in the study. This is so  
33  
34  
35  
36  
37  
38  
39  
40  
41  
42  
43  
44  
45  
46  
47  
48  
49  
50  
51  
52  
53  
54  
55  
56  
57  
58  
59  
60

1  
2  
3 that if there is any distress during the patient interviews, which requires medical  
4 management they can be referred to their GP. Open-ended non-leading questions on their  
5 diagnosis, management post operatively in hospital and management in the community will  
6 be asked allowing the participant to describe their experiences without unnecessary  
7 interruption<sup>29</sup>. Discussion will be directed towards outcomes of importance to the patient  
8 as seen in the topic guide. The interviewer will not discuss their own opinions about CES and  
9 if these are asked they will be answered at the end of the interview session. Reflexivity is an  
10 important concept during qualitative research for striving towards objectivity and  
11 neutrality<sup>28</sup> and the analysis of the interviews will consider if bias from the interviewer's  
12 own beliefs may have crept in. It is anticipated that the interview will last for 45 minutes to  
13 an hour at each sitting to prevent the participant feeling fatigued. The same interviewer  
14 (NS) will be used for all the patient interviews. All interviewees will be made aware that the  
15 interviewer is a doctor not involved in their on-going care. A sample of the transcripts will  
16 be reviewed by a supervisor not involved in the qualitative interviews to confirm that they  
17 were undertaken in a satisfactory manner.

18  
19 Initially, the transcripts will be reviewed to start identifying which outcomes are important  
20 to the patients by labelling the data using NVivo qualitative data analysis software version  
21 10. A pragmatic approach will be taken by using thematic analysis as per the Braun and  
22 Clarke method<sup>30</sup>. It is a pattern-based qualitative method like grounded theory<sup>31</sup> and  
23 interpretative phenomenological analysis<sup>32</sup> but is not linked to a specific theoretical  
24 framework. This method will allow summarisation of the key outcomes of each individual  
25 transcript and overall themes whilst retaining the context and language in which it was  
26 expressed<sup>28</sup>. The qualitative interviews will be reported as outlined by the consolidated  
27 criteria for reporting qualitative research (COREQ); a 32 item checklist<sup>33</sup>.

### 48 49 ***Phase 3: The Delphi Survey***

50  
51  
52 The outcomes from the systematic literature review and qualitative interviews will create a  
53 long list<sup>11</sup>. This will be condensed by grouping similar outcomes into domains and  
54 conforming with the taxonomy used in the systematic literature review<sup>20 23</sup>. This will be  
55 reviewed and agreed by the study team and pilot tested with the key stakeholders before  
56 the Delphi survey is distributed.  
57  
58  
59  
60

## Research Question

Which outcomes do patients and healthcare professionals think should be included in a core outcome set for patients with CES?

## Method

All patients with CES will be invited to participate in the Delphi survey regardless of whether they had had surgery or not. Although there are a minority of participants in the category of non-operative management of CES<sup>34</sup> it was decided by the study team that including them will be an opportunity to consider their input and maximise recruitment. The Delphi will be done by healthcare professionals and patients.

To achieve a priority list, we will use the “modified” Delphi method<sup>35</sup> as opposed to the “traditional” Delphi method<sup>36</sup>. Traditionally in a Delphi survey patients are asked open questions in the first round of the Delphi and the answers would constitute the outcomes rated in the second round. In the “modified” Delphi, which will be used in this study, rating the outcomes will take place over two rounds. A list of outcomes previously attained from the systematic literature review and qualitative interviews will be presented in the first round of the Delphi<sup>35</sup>. Patients can also suggest outcomes that have not been mentioned in the first round but these will not be scored. They will be considered for inclusion into the second round of the Delphi if, as judged by the CES study team, the outcome does not reflect or is not similar to another outcome already listed. The CES study team includes a patient representative.

The level of anonymity will be “fully anonymised”<sup>37</sup> so participants do not know the identities of other individuals in the group and they will not know the specific answers other individuals give. In round 2 of the Delphi, participants will know the group responses from the patient group and the healthcare professional group. Individual participants can decide to keep their original rating or to change their rating in the next round. This will lead to the group converging on a consensus opinion over the course of these two rounds<sup>37</sup>.

## Inclusion criteria

Participants will be recruited from two key stakeholder groups: patients and healthcare professionals. All participants will be adults over 18 years of age and able to complete an

1  
2  
3 online survey in the English language.

4  
5 *Patients*- Participants who have had an operation for CES.

6  
7 *Healthcare Professionals*- All members of the clinical team involved in directly caring for a  
8 patient with CES such as:

- 9  
10  
11  
12  
13  
14  
15  
16  
17
- Spinal surgeons
  - Spinal specialist nurses
  - Neuro-rehabilitation doctors

### 18 **Sampling and Recruitment**

19  
20 *Patients*- At the main site the clinical care team have a pre-existing database of CES patients  
21 they have clinically managed. The clinical care team will send an invitation letter to the  
22 home address of these patients. There will be no follow up calls or further correspondence.  
23 It is the patient's decision if they wish to be involved and the invitation will contain details of  
24 the website address patients can access if they wish to find out more details regarding the  
25 study. Online patient groups for CES will be contacted internationally. A named contact for  
26 each group will act as the liaison member to circulate the participant invitation email and  
27 poster. This may include the patient groups sharing the recruitment details on social media.  
28  
29  
30  
31  
32  
33  
34  
35

36  
37 *Healthcare Professionals*- The main study site has spinal MDT (multi-disciplinary team)  
38 meetings held weekly. The coordinator has a pre-set mailing list that goes to healthcare  
39 professionals involved in the meeting. This will be used to send the participant invitation  
40 email. The membership of national and international associations will be contacted and  
41 invited to participate. They include different healthcare professionals in their membership  
42 categories. Some examples are listed below:  
43  
44  
45  
46

- 47  
48  
49  
50  
51  
52  
53  
54
- Society of British Neurological Surgeons (SBNS)
  - British Association of Spine Surgeons (BASS)
  - World Federation of Neuro-rehabilitation (WFNR)
  - Spinal Injuries Association (SIA)

55 Known contacts of the CES study group will be contacted and invited to participate.

56  
57 Snowballing sampling will be used to increase the sample size. The participant invitation  
58 email/ letter will be the first contact for healthcare professionals and patients, which is a  
59  
60



1  
2  
3 short introduction and summary of the study. If they are interested further the participant  
4 can proceed to the registration website for further details and obtain a copy of the  
5 participant information leaflet.  
6  
7  
8  
9

### 10 **Sample Size**

11  
12 There are no strict recommendations for the number of participants (patients and  
13 healthcare professionals) required in a Delphi study to gain consensus<sup>37</sup>. In general, having  
14 more participants will increase the reliability of the group judgement<sup>38</sup>. A pragmatic  
15 approach to sample size will be taken and all individuals who meet the inclusion criteria as  
16 identified above will be invited to participate. The recruitment phase will be 2 months  
17 before the first round of the Delphi survey is released. Documentation of the organisations  
18 who distribute the Delphi invitation from each stakeholder group will be recorded. No  
19 further participants will be invited after the first round of the Delphi.  
20  
21  
22  
23  
24  
25  
26  
27  
28

### 29 **Consent**

30  
31 Consent will be implicit by the participant (patients and healthcare professionals) registering  
32 their name and email address to take part in the Delphi survey via the website.  
33  
34  
35

### 36 **Questionnaires**

37  
38 The questionnaire is constructed and delivered in an online format using the DelphiManager  
39 software developed by the COMET initiative. Before starting the questionnaire, the  
40 participant will be asked to clarify which of the two stakeholder groups they belong to. For  
41 each stakeholder group, specific information will be collected:  
42  
43  
44

- 45 • *Patients*- Age, gender, location, surgery for CES- yes/no, years since surgery for CES,  
46 employed- full time/ employed- part time/ unemployed
  - 47 • *Healthcare professionals*- Practicing Field (spinal surgeon, specialist nurse, neuro-  
48 rehabilitation etc), years in practice, location, gender
- 49  
50  
51  
52

53  
54 Following confirmation of their eligibility to participate in the study, participants will be sent  
55 an on-line link to access the first round of the Delphi process. Instructions of how to  
56 complete the questionnaire will be included at the beginning of each round. Only  
57 participants who respond to the 1<sup>st</sup> round of the Delphi will be invited to participate in 2<sup>nd</sup>  
58  
59  
60

1  
2  
3 round taking the assumption that if they had not participated in the first round they would  
4 be unwilling to participate in the second round. Data will be collected over at least a 4-week  
5 period for each round of the Delphi process. Participants who have not completed the  
6 survey will be sent reminders via email when they have 2 weeks, 1 week and 48 hours  
7 remaining for completion of the survey. Participants who have not completed the  
8 questionnaire within 4 weeks of the start will be deemed not to have completed that round  
9 of the Delphi. The language used by patients in the qualitative interviews will be used to  
10 help term the outcomes for the Delphi. Plain language summaries by the COMET Patient  
11 Participation, Involvement and Engagement (PoPPiE) group was used to develop the Delphi  
12 information sheet. The Delphi will be piloted with 2 participants from each stakeholder  
13 group to highlight any issues with understanding or validity.  
14  
15  
16  
17  
18  
19  
20  
21  
22  
23  
24

### 25 **Scoring**

26  
27 For an outcome to be included in the core outcome set there must be a majority agreement  
28 of the critical importance of the outcome and minority agreement that the outcome is not  
29 important<sup>39</sup>. This is in par with the GRADE (Grading of Recommendations Assessment,  
30 Development and Evaluation) working group recommendations  
31 (<http://www.gradeworkinggroup.org>;<sup>40 41</sup>. At the beginning of the Delphi, participants will  
32 be reminded the importance of completing the entire Delphi process. Round one of the  
33 Delphi study we will ask participants to rate each outcome using a 9 point Likert scale. This  
34 scoring system was chosen after previous studies and expert databases showed it  
35 differentiates the most between questionnaire items<sup>16 37</sup>. 7-9 indicates critical importance.  
36 4 to 6 represents outcomes that are important but not critical whilst 1 to 3 are deemed to  
37 be of limited importance. All outcomes will be carried through to second round with  
38 anonymised feedback of first round scores from the patient group and from the healthcare  
39 professional group displayed for each outcome. The feedback will show the cumulated  
40 scores from each stakeholder group for each outcome and the participant will be asked to  
41 rate the outcomes again using the same 9 point Likert scale. If they change their score on  
42 the second round they will have the opportunity to explain their reasoning for this.  
43 Outcomes which have been suggested in round 1 by the participants and deemed  
44 appropriate by the study group will then be entered in for rating in the second round by key  
45 stakeholders. After the final Delphi round, there will be a list developed from all stakeholder  
46  
47  
48  
49  
50  
51  
52  
53  
54  
55  
56  
57  
58  
59  
60

groups, which will be submitted to a face to face consensus meeting of key stakeholders to discuss what outcomes that should be finally included in the core outcome set. All participants who had completed both rounds of the Delphi survey will be eligible for invitation to the consensus meeting. A trained independent facilitator would chair this meeting.

### Analysis

Consensus that an outcome should be included in the core outcome set is defined as 70% or more scoring it as 7 to 9 and fewer than 15% scoring it as 1 to 3, which is has been seen to be successful with the development of other core outcome sets<sup>42 43</sup> (**Table 4**). This will be done for each stakeholder group. Results at the multiple rounds of the Delphi process and consensus meeting will be documented to include the number of participants invited, number completing the section, measure of each group response to an outcome leading to a comprehensive list of all outcomes that should be included in the COS CES.

**Table 4.** Definitions of a consensus

| Classification of consensus | Description                                                           | Definition                                                                                                    |
|-----------------------------|-----------------------------------------------------------------------|---------------------------------------------------------------------------------------------------------------|
| <b>IN</b>                   | Consensus that outcome should be included in the core outcome set     | 70% or more participants scoring as 7 to 9 AND <15% participants scoring as 1 to 3 in both stakeholder groups |
| <b>OUT</b>                  | Consensus that outcome should not be included in the core outcome set | 50% or less participants scoring 7 to 9 in both stakeholder groups                                            |
| <b>NO CONSENSUS</b>         | Uncertainty about importance of outcome                               | Anything else                                                                                                 |

### Attrition

It is expected that some participants will drop out after each round of the Delphi. Each participant will be given a unique participant number when they complete the first round of

1  
2  
3 the Delphi, which will allow calculation of the attrition rates between rounds. This will allow  
4 identification of participants who have completed all rounds and see if there is any  
5 difference bias between those participants who complete the process. Mean round 1 scores  
6 for the participants who completed round 1 and round 2 will be compared with those that  
7 dropped out after round 1.  
8  
9  
10  
11  
12  
13

#### 14 ***Phase 4: Consensus Meeting***

15  
16  
17 All participants registering for the Delphi survey will be asked if they would be happy to  
18 attend a face to face consensus meeting involving patients and healthcare professionals.  
19 They will need to complete both rounds of the Delphi survey to be eligible to attend. This  
20 would be set up as a tick box on the registration page for the online Delphi.  
21  
22 40 participants will be invited to the consensus meeting. This will include 20 healthcare  
23 professionals and 20 patients. Out of the 40 participants; 30 will be from the UK and 10 will  
24 be international. Standard travel expenses and hotel accommodation will be reimbursed or  
25 provided. 10 of the participants at the consensus meeting will be invited before the Delphi  
26 survey is released to attend the consensus meeting but on the premise, that both rounds of  
27 the Delphi are completed. This is to make sure there is representation at the consensus  
28 meeting from key stakeholder organisations closely involved with CES patients, research or  
29 management. 30 participants at the consensus meeting will be those who have completed  
30 both rounds of the Delphi and ticked their interest to attend the consensus meeting during  
31 registration.  
32  
33  
34  
35  
36  
37  
38  
39  
40  
41  
42  
43  
44

45 In the development of a breast reconstruction core outcome set patients and professionals  
46 were recruited in a 2:1 ratio so that patients' views were represented preferentially as the  
47 procedure is a patient selected optional intervention<sup>44</sup>. In our study, clinical intervention for  
48 cauda equina syndrome is performed as an emergency so it was deemed appropriate by the  
49 study team to have a 1:1 ratio of patients and healthcare professionals. This is to maximise  
50 the number of participants involved to help achieve consensus. In addition, the core  
51 outcome set should reflect all key stakeholders input equally. If there is an overwhelming  
52 response with more than 40 participants interested in attending the consensus meeting the  
53  
54  
55  
56  
57  
58  
59  
60

1  
2  
3 study team will apply stratified purposive sampling. On the day of the consensus meeting  
4 informed consent will be obtained from the patient participants.  
5

6  
7 Outcomes categorised as “consensus in” across both stakeholder groups from the Delphi  
8 survey (**Table 4**) will be included in the final core outcome set. Outcomes categorised as  
9 “consensus out” across both stakeholder groups from the Delphi survey will be excluded  
10 from the final core outcome set. Results of the Delphi survey will be discussed at the  
11 consensus meeting and the main discussion will be regarding the outcomes deemed as  
12 achieving “no consensus” in the Delphi survey. Participants at the meeting will vote on these  
13 outcomes. The same criteria for consensus used in the Delphi survey (**Table 4**) will be used  
14 in the consensus meeting. All outcomes that reach “consensus in” will be included in the  
15 core outcome set. All outcomes in the “consensus out” or “no consensus” category after  
16 voting in the consensus meeting will not be included in the core outcome set. If there is no  
17 agreed final core outcome set at the end of the first meeting subsequent meetings will be  
18 arranged for this to happen. The participants who had completed both rounds of the Delphi  
19 survey would be invited to attend another consensus meeting if required.  
20  
21  
22  
23  
24  
25  
26  
27  
28  
29  
30  
31

## 32 **PATIENT INVOLVEMENT**

33  
34  
35  
36 Patients will be involved in the design, review and recruitment of the study. The scope of  
37 the research question will be decided with the study team that includes 2 research partners  
38 who are patients with CES. The qualitative interviews will be trailed with the patient  
39 research partners and the topic guide will be reviewed by them. Pilot testing of the Delphi  
40 survey will be done by the patient research partners who will be asked to review the patient  
41 explanations of the outcomes and the questions on the registration page. Patients will be  
42 involved in the recruitment stage of the Delphi as they will be requested via social media to  
43 forward the website link for the Delphi survey to any relevant known contacts.  
44  
45  
46  
47  
48  
49  
50  
51

## 52 **ETHICS AND DISSEMINATION**

53  
54  
55  
56 REC and HRA approval was obtained on the 6 December 2016 for the qualitative interviews  
57 from South Central - Hampshire A Research Ethics Committee. REC reference 16/SC/0587.  
58 REC and HRA approval was obtained on 26 March 2018 for the Delphi process and  
59  
60

1  
2  
3 consensus meeting from North West- Greater Manchester Central Research Ethics  
4 Committee. REC reference was 18/NW/0022. We intend to publish the results of the core  
5 outcome set for patients with CES in an open access journal. It will also be made available  
6 through the CES patient charity websites. Results will be disseminated through International  
7 and national presentations. The next step would be to identify the appropriate  
8 measurement instrument for each of the outcomes in the core outcome set <sup>45</sup>. Core  
9 outcome sets are developed in a number of clinical areas and their use is advocated in the  
10 UK by the National Institute for Health Research (NIHR) Health Technology Assessment  
11 (HTA), Cochrane Reviews of the effects of Healthcare intervention <sup>46</sup> and by World Health  
12 Organisation (WHO) handbook for guideline development <sup>17</sup>. The NIHR HTA has added this  
13 statement to their application form, "Where established core outcomes exist they should be  
14 included among the list of outcomes unless there is a good reason to do otherwise." By  
15 developing the CES core outcome set we intend to reduce outcome reporting bias,  
16 heterogeneity, and improve the quality of research studies in CES. This will allow us to  
17 synthesise the data and make more robust evidence based decisions regarding the  
18 management of CES.  
19  
20  
21  
22  
23  
24  
25  
26  
27  
28  
29  
30  
31  
32  
33

### 34 **Author Contributions**

35 NS, MW, SC conceived the project. AGM is the principal investigator for the study. NS is the  
36 clinical research fellow responsible for management of the project, wrote the protocol and  
37 manuscript. AGM, PRW, AJN, MW, SC provide supervision, have input in all aspects of the  
38 project, commented on drafts of the manuscript. All authors have read and approved the  
39 manuscript.  
40  
41  
42  
43  
44  
45  
46  
47

### 48 **Acknowledgements**

49 Special thanks to Ms Claire Thornber and Mr Steven Smith as patient research partners in  
50 this study.  
51  
52  
53

### 54 **Funding**

55 The corresponding author's research fellowship is funded by The Walton Centre Research  
56 Funds and The Royal College of Surgeons Research Fellowship.  
57  
58  
59  
60

## Competing Interests

None Declared

## Supplementary file 1- Topic guide

**Figure 1.** The overall study timeline

## REFERENCES

1. Kostuik JP. Controversies in cauda equina syndrome and lumbar disk herniation. *Current Opinion in Orthopaedics* 1993;4(2):125-28.
2. Gardner A, Gardner E, Morley T. Cauda equina syndrome: A review of the current clinical and medico-legal position. *Eur Spine J* 2011;20(5):690-97. doi: <http://dx.doi.org/10.1007/s00586-010-1668-3>
3. Gitelman A, Hishmeh S, Morelli BN, et al. Cauda equina syndrome: a comprehensive review. *Am J Orthop (Belle Mead NJ)* 2008;37(11):556-62.
4. Gleave JR, Macfarlane R. Cauda equina syndrome: what is the relationship between timing of surgery and outcome? *Br J Neurosurg* 2002;16(4):325-8.
5. Sorbie C. Cauda equina syndrome. *Orthopedics* 2009;32(6):397. doi: <http://dx.doi.org/10.3928/01477447-20090511-31>
6. Taskforce TNS. Commissioning Spinal Services - Getting The Service Back On Track . January 2013
7. Todd NV. Cauda equina syndrome: The timing of surgery probably does influence outcome. *Br J Neurosurg* 2005;19(4):301-06. doi: <http://dx.doi.org/10.1080/02688690500305324>
8. Srikandarajah N, Boissaud-Cooke MA, Clark S, et al. Does early surgical decompression in cauda equina syndrome improve bladder outcome? *Spine (03622436)* 2015;40(8):580-83. doi: 10.1097/BRS.0000000000000813
9. Ahn UM, Ahn NU, Buchowski JM, et al. Cauda equina syndrome secondary to lumbar disc herniation. *Spine* 2000;25(12):1515-22. doi: <http://dx.doi.org/10.1097/00007632-200006150-00010>
10. Daniels EW, Gordon Z, French K, et al. Review of medicolegal cases for cauda equina syndrome: what factors lead to an adverse outcome for the provider? *Orthopedics* 2012;35(3):200-00. doi: 10.3928/01477447-20120222-15
11. Williamson PR, Altman DG, Bagley H, et al. The COMET handbook: version 1.0. *Trials* 2017;18(3):280.
12. Armstrong R, Hall BJ, Doyle J, et al. 'Scoping the scope' of a cochrane review. *Journal of Public Health* 2011;33(1):147-50.
13. Williamson PR, Altman DG, Blazeby JM, et al. Developing core outcome sets for clinical trials: issues to consider. *Trials* 2012;13(1):132.
14. Kirkham JJ, Gargon E, Clarke M, et al. Can a core outcome set improve the quality of systematic reviews?—a survey of the Co-ordinating Editors of Cochrane Review Groups. *Trials* 2013;14(1):21.
15. Tugwell P, Boers M, Brooks P, et al. OMERACT: an international initiative to improve outcome measurement in rheumatology. *Trials* 2007;8(1):38.

16. COMET. The COMET Initiative. 2018
17. Williamson PR, Altman DG, Blazeby JM, et al. The COMET (core outcome measures in effectiveness trials) initiative. *Trials* 2011;12(Suppl 1):A70.
18. Kirkham JJ, Davis K, Altman DG, et al. Core Outcome Set-STAndards for Development: The COS-STAD recommendations. *PLoS medicine* 2017;14(11):e1002447.
19. Young B, Bagley H. Including patients in core outcome set development: issues to consider based on three workshops with around 100 international delegates. *Research Involvement and Engagement* 2016;2(1):25.
20. Srikandarajah N, Wilby M, Clark S, et al. Outcomes reported after surgery for Cauda Equina Syndrome: A Systematic Literature Review. *Spine* 2018
21. Moher D, Liberati A, Tetzlaff J, et al. Preferred reporting items for systematic reviews and meta-analyses: the PRISMA statement. *PLoS medicine* 2009;6(7):e1000097.
22. Kostuik JP. Medicolegal consequences of cauda equina syndrome: an overview. *Neurosurg* 2004;16(6):e8.
23. Dodd S, Clarke M, Becker L, et al. A taxonomy has been developed for outcomes in medical research to help improve knowledge discovery. *Journal of clinical epidemiology* 2018;96:84-92.
24. Keeley T, Khan H, Pinfold V, et al. Core outcome sets for use in effectiveness trials involving people with bipolar and schizophrenia in a community-based setting (PARTNERS2): study protocol for the development of two core outcome sets. *Trials* 2015;16(1):47.
25. Elo S, Kyngäs H. The qualitative content analysis process. *Journal of advanced nursing* 2008;62(1):107-15.
26. Quinn Patton M. Qualitative Research John Wiley & Sons: Ltd, 2005.
27. Gleave JRW, Macfarlane R. Cauda equina syndrome: What is the relationship between timing of surgery and outcome? *Br J Neurosurg* 2002;16(4):325-28. doi: <http://dx.doi.org/10.1080/0268869021000032887>
28. Ritchie J, Lewis J, Nicholls CM, et al. Qualitative research practice: A guide for social science students and researchers: Sage 2013.
29. Britten N. Qualitative research: qualitative interviews in medical research. *Bmj* 1995;311(6999):251-53.
30. Braun V, Clarke V. Using thematic analysis in psychology. *Qualitative research in psychology* 2006;3(2):77-101.
31. Charmaz K. Constructing grounded theory: A practical guide through qualitative analysis: Sage 2006.
32. Smith JA, Flowers P, Larkin M. Interpretative phenomenological analysis: Theory, method and research 2009.
33. Tong A, Sainsbury P, Craig J. Consolidated criteria for reporting qualitative research (COREQ): a 32-item checklist for interviews and focus groups. *International journal for quality in health care* 2007;19(6):349-57.
34. Khurana R, Arora SK, Hemal A, et al. Successful non-operative management of cauda equina syndrome in a case of thalassemia major. *Pediatric Hematology Oncology Journal* 2016;1(2):41-43.
35. Keeley T, Williamson P, Callery P, et al. The use of qualitative methods to inform Delphi surveys in core outcome set development. *Trials* 2016;17(1):230.
36. Hasson F, Keeney S, McKenna H. Research guidelines for the Delphi survey technique. *Journal of advanced nursing* 2000;32(4):1008-15.
37. Sinha IP, Smyth RL, Williamson PR. Using the Delphi technique to determine which outcomes to measure in clinical trials: recommendations for the future based on a systematic review of existing studies. *PLoS medicine* 2011;8(1):e1000393.



- 1
- 2
- 3
- 4 38. Murphy M. Consensus development methods and their use in clinical guideline
- 5 development. *Health Technol Assess* 1998;2:1-88.
- 6 39. Jaeschke R, Guyatt GH, Dellinger P, et al. Use of GRADE grid to reach decisions on
- 7 clinical practice guidelines when consensus is elusive. *BMJ: British Medical Journal*
- 8 *(Online)* 2008;337
- 9 40. Atkins D, Best D, Briss PA, et al. Grading quality of evidence and strength of
- 10 recommendations. *BMJ (Clinical research ed)* 2004;328(7454):1490-90.
- 11 41. Guyatt GH, Oxman AD, Vist GE, et al. GRADE: an emerging consensus on rating quality
- 12 of evidence and strength of recommendations. *BMJ (Clinical research ed)*
- 13 2008;336(7650):924-26.
- 14 42. Harman NL, Bruce IA, Callery P, et al. MOMENT–Management of Otitis Media with
- 15 Effusion in Cleft Palate: protocol for a systematic review of the literature and
- 16 identification of a core outcome set using a Delphi survey. *Trials* 2013;14(1):70.
- 17 43. Haywood K, Griffin X, Achten J, et al. Developing a core outcome set for hip fracture
- 18 trials. *Bone Joint J* 2014;96(8):1016-23.
- 19 44. Potter S, Holcombe C, Ward J, et al. Development of a core outcome set for research and
- 20 audit studies in reconstructive breast surgery. *British Journal of Surgery*
- 21 2015;102(11):1360-71.
- 22 45. Prinsen CA, Vohra S, Rose MR, et al. How to select outcome measurement instruments
- 23 for outcomes included in a “Core Outcome Set”—a practical guideline. *Trials*
- 24 2016;17(1):449.
- 25 46. Rosenbaum SE, Glenton C, Oxman AD. Summary-of-findings tables in Cochrane
- 26 reviews improved understanding and rapid retrieval of key information. *Journal of*
- 27 *clinical epidemiology* 2010;63(6):620-26.
- 28
- 29
- 30
- 31
- 32
- 33
- 34
- 35
- 36
- 37
- 38
- 39
- 40
- 41
- 42
- 43
- 44
- 45
- 46
- 47
- 48
- 49
- 50
- 51
- 52
- 53
- 54
- 55
- 56
- 57
- 58
- 59
- 60

1  
2  
3  
4  
5  
6  
7  
8  
9  
10  
11  
12  
13  
14  
15  
16  
17  
18  
19  
20  
21  
22  
23  
24  
25  
26  
27  
28  
29  
30  
31  
32  
33  
34  
35  
36  
37  
38  
39  
40  
41  
42  
43  
44  
45  
46  
47  
48  
49  
50  
51  
52  
53  
54  
55  
56  
57  
58  
59  
60

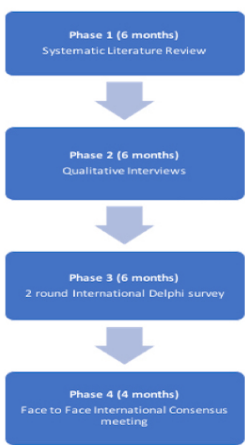

The overall study timeline in four phases with the estimated timeframes.

90x90mm (300 x 300 DPI)

IRAS: 201946 Version: 1.1 Date: 23/09/16

## TOPIC GUIDE CES QUALITATIVE INTERVIEWS

### Aims and Objectives

- To explore the patient experience of living with Cauda Equina Syndrome (CES)
- To ascertain what the patient feels are the most important outcomes that they are experiencing
- To ascertain what outcomes the patient feels are the most important to research in to improve CES management and aftercare
- To determine who should be key stakeholders
- Identify appropriate language to use for patient Delphi iterative process.

### Introduction (5-10 mins)

Interviewer Name

Interviewer Occupation

Explain basic definition of CES

Explain looking for challenges experienced after the operation for CES

Explain expected intention, sensitive subjects and duration of interview and confidentiality

Confirm consent to qualitative interview

### Background (<5 mins)

Interviewee name

Interviewee age

Interviewee occupation

Other medical conditions

When was your operation for CES?

### Interview questions (30 mins)

How has your experience of this condition; Cauda Equina Syndrome been?

- What was it like before the back operation?

- What was it like after the back operation?

How do you feel your condition has been managed in hospital and in the community?

What were your expectations of life health-wise after the operation and what is the reality like?

IRAS: 201946 Version: 1.1 Date: 23/09/16

1  
2  
3 Due to this condition what do you feel are the challenges to your health and  
4 wellbeing?

- 5 -bowel/bladder  
6 -sex life  
7 -back/ leg pain  
8 -psychological  
9 -anxiety/fear  
10 -other  
11  
12

13  
14 Would you be able to prioritise the importance of these for you now?  
15

16 Was the importance of these different at earlier stages of the condition? (More  
17 relevant to those in the long term CES category)  
18

19 Through this process of living with CES who else do you think has a good handle  
20 on the condition? If anyone? -Gauge other potential key stakeholders  
21  
22

23 Tell me a bit about the support you had for the condition?  
24

25 **Closing remarks (5 mins)**  
26

27 Considering your hospital, post op and follow up experience what would you  
28 have liked to change?  
29

- 30 -support services  
31 -more streamlined service with dedicated clinics  
32 -research into timing for CES operations  
33 -follow up as to the effects of long term CES  
34  
35

36 Offer the opportunity for the participant to comment on their interview  
37 transcript after transcription.  
38  
39  
40  
41  
42  
43  
44  
45  
46  
47  
48  
49  
50  
51  
52  
53  
54  
55  
56  
57  
58  
59  
60
